# Supplementary material
Source: PubMed Central journal article supplement (PMC9069394)
Supplement: NIHMS1693080-supplement-1.pdf [file NIHMS1693080-supplement-1.pdf]

## Supplementary Methods:

We used DESeq2 for differential abundance analysis<sup>1</sup>; We followed their standard procedure to generate an adjusted p-value. DESeq2 has an internal step for scaling and normalization before calculating p-values. The input is the absolute abundance table without any normalization. We did not change any default value of their parameters. The output is a tab-delimited table, including the p-value, adjusted p-value, and Log2 foldchange of each OTU.

We used MaAsLin2<sup>2</sup> for determining the multivariable association between covariates and microbial features; we used their recommended procedure to perform the test. The input is the absolute abundance table without any normalization. Here are the parameters that we used, min\_abundance(0.00001), min\_prevalence(0.001), max\_significance(0.25), standardize(TRUE), analysis method (CPLM which stands for Compound Poisson Linear Models). The output is tab-delimited table includes the p-value, q-value, coefficient, and standard error of each covariate compared to our fixed effect variables.

BiomMiner<sup>3</sup> is a workflow which utilizes highly popular/cited statistical methods to analyze and visualizes metagenomics dataset. For each method, BiomMiner follows the recommended standard procedure without prior modification. It visualizes each report using carefully studied methods to be easy to understand and sophisticated enough to present the research. The aggregated report is an HTML platform.

## Supplementary References:

- 1 Love, M. I., Huber, W. & Anders, S. Moderated estimation of fold change and dispersion for RNA-seq data with DESeq2. *Genome biology* **15**, 550, doi:10.1186/s13059-014-0550-8 (2014).
- 2 <https://huttenhower.sph.harvard.edu/maaslin/>.
- 3 Shamsaddini, A., Dadkhah, K. & Gillevet, P. M. BiomMiner: An advanced exploratory microbiome analysis and visualization pipeline. *PLoS One* **15**, e0234860, doi:10.1371/journal.pone.0234860 (2020).

## Supplementary Tables

**Table S1: Characteristics of Subject Groups Based on HE**

|                             | Controls<br>(n=40) | All Cirrhosis (n=163) |               |                | P value<br>between<br>all<br>groups* | P value<br>comparing<br>Cirr-L and<br>Cirr-LR# |
|-----------------------------|--------------------|-----------------------|---------------|----------------|--------------------------------------|------------------------------------------------|
|                             |                    | No-HE<br>(n=63)       | HE (n=100)    |                |                                      |                                                |
|                             |                    |                       | Cirr-L (n=43) | Cirr-LR (n=57) |                                      |                                                |
| Age                         | 58.6±10.3          | 60.1±7.4              | 57.9±9.8      | 61.1±7.6       | 0.09                                 | 0.08                                           |
| Gender (male)               | 24 (60%)           | 46 (73%)              | 34 (79%)      | 46 (80%)       | 0.09                                 | 0.90                                           |
| Proton pump inhibitor       | NA                 | 25 (40%)              | 25 (59%)      | 41 (71%)       | 0.002                                | 0.15                                           |
| Type 2 Diabetes             | NA                 | 27 (42%)              | 12 (23%)      | 22 (28%)       | 0.28                                 | 0.26                                           |
| MELD score                  | NA                 | 9.3±3.8               | 13.3±4.7      | 12.8±4.8       | <0.0001                              | 0.60                                           |
| Alcohol-related etiology    | NA                 | 10 (16%)              | 22 (51%)      | 24 (42%)       | <0.0001                              | 0.37                                           |
| Daily caloric intake        | 2229±239           | 2138±421              | 2098±398      | 2104±581       | 0.36                                 | 0.95                                           |
| Shannon diversity           | 2.78±0.27          | 2.56±0.0.35           | 2.35±0.63     | 1.70±0.74      | <0.0001                              | <0.0001                                        |
| Hospitalizations in 90 days | NA                 | 3 (5%)                | 24 (56%)      | 17 (30%)       | <0.0001                              | 0.008                                          |
| Death in 1 year             | NA                 | 0 (0%)                | 7 (16%)       | 7 (12%)        | <0.0001                              | 0.56                                           |

Data presented as raw number (%) or mean±SD. \*: ANOVA, Chi-square tests as appropriate,

#Chi-square and unpaired t-tests as appropriate, Cirr-L: patients with cirrhosis on lactulose only,

Cirr-LR: patients with cirrhosis on lactulose and rifaximin, NA: not applicable

**Table S2: Kruskal-Wallis Comparison of Controls versus Cirrhosis Bacterial Species**

| Lineage                                                  | LOG2FC | Direction | pvalue   |
|----------------------------------------------------------|--------|-----------|----------|
| <i>Lactobacillus_timonensis</i>                          | 11.66  | Cirrhosis | 0.015264 |
| <i>Lactobacillus_reuteri</i>                             | 10.79  | Cirrhosis | 0.005677 |
| <i>Lactobacillus_sp_UMNPBX3</i>                          | 10.53  | Cirrhosis | 0.022538 |
| <i>Lactobacillus_antri</i>                               | 10.51  | Cirrhosis | 0.001222 |
| <i>Citrobacter_sp_CFNH10</i>                             | 10.46  | Cirrhosis | 0.0225   |
| <i>Citrobacter_farmeri</i>                               | 10.39  | Cirrhosis | 0.012415 |
| <i>Morganella_morganii</i>                               | 10.29  | Cirrhosis | 0.027143 |
| <i>Klebsiella_sp_2N3</i>                                 | 10.24  | Cirrhosis | 0.002351 |
| <i>Klebsiella_sp_MS_92_3</i>                             | 10.23  | Cirrhosis | 5.93E-04 |
| <i>Lactobacillus_plantarum</i>                           | 10.1   | Cirrhosis | 0.00104  |
| <i>Klebsiella_michiganensis</i>                          | 9.88   | Cirrhosis | 7.64E-06 |
| <i>Klebsiella_sp_HMSC16A12</i>                           | 9.62   | Cirrhosis | 0.008356 |
| <i>Lactobacillus_sp_HMSC066G01</i>                       | 9.47   | Cirrhosis | 0.004498 |
| <i>Citrobacter_braakii</i>                               | 9.41   | Cirrhosis | 0.027096 |
| <i>Lactobacillus_gastricus</i>                           | 9.4    | Cirrhosis | 0.029906 |
| <i>Lactobacillus_sp_HMSC077C11</i>                       | 9.3    | Cirrhosis | 0.022528 |
| <i>Pluralibacter_gergoviae</i>                           | 9.25   | Cirrhosis | 0.048071 |
| <i>Enterobacter_cloacae_complex_Hoffmann_cluster_IV</i>  | 9.24   | Cirrhosis | 0.012521 |
| <i>Lactobacillus_delbrueckii</i>                         | 9.23   | Cirrhosis | 0.005729 |
| <i>Klebsiella_pneumoniae</i>                             | 9.19   | Cirrhosis | 3.50E-04 |
| <i>Lactobacillus_gasseri</i>                             | 9.17   | Cirrhosis | 1.51E-05 |
| <i>Lactobacillus_brevis</i>                              | 9.11   | Cirrhosis | 0.039855 |
| <i>Lactobacillus_sp_HMSC24D01</i>                        | 9.05   | Cirrhosis | 0.003639 |
| <i>Microvirgula_aerodenitrificans</i>                    | 9      | Cirrhosis | 0.002938 |
| <i>Lactobacillus_pentosus</i>                            | 9      | Cirrhosis | 0.032999 |
| <i>Citrobacter_amalonaticus</i>                          | 8.99   | Cirrhosis | 0.027216 |
| <i>Lactobacillus_johnsonii</i>                           | 8.87   | Cirrhosis | 0.00894  |
| <i>Enterobacter_cloacae_complex_Hoffmann_cluster_III</i> | 8.87   | Cirrhosis | 0.027143 |
| <i>Klebsiella_variicola</i>                              | 8.85   | Cirrhosis | 7.65E-04 |
| <i>Enterococcus_avium</i>                                | 8.83   | Cirrhosis | 0.015276 |
| <i>Enterobacter_asburiae</i>                             | 8.77   | Cirrhosis | 3.64E-04 |
| <i>Citrobacter_werkmanii</i>                             | 8.62   | Cirrhosis | 0.003636 |
| <i>Megasphaera_micronuciformis</i>                       | 8.57   | Cirrhosis | 4.00E-06 |
| <i>Streptococcus_sp_HMSC071H03</i>                       | 8.57   | Cirrhosis | 0.027236 |
| <i>Klebsiella_sp_4_1_44FAA</i>                           | 8.51   | Cirrhosis | 0.027182 |
| <i>Lactobacillus_rhamnosus</i>                           | 8.47   | Cirrhosis | 0.007423 |
| <i>Lactobacillus_sp_HMSC072E07</i>                       | 8.41   | Cirrhosis | 0.018524 |

|                                               |      |           |          |
|-----------------------------------------------|------|-----------|----------|
| <i>Lactobacillus_sp_HMSC068B07</i>            | 8.4  | Cirrhosis | 0.027263 |
| <i>Lactobacillus_sp_HMSC056D05</i>            | 8.37 | Cirrhosis | 0.048095 |
| <i>Klebsiella_sp_HMSC25G12</i>                | 8.35 | Cirrhosis | 0.033026 |
| <i>Bifidobacterium_dentium</i>                | 8.34 | Cirrhosis | 0.00397  |
| <i>Veillonella_sp_3_1_44</i>                  | 8.31 | Cirrhosis | 2.82E-05 |
| <i>Lactobacillus_taiwanensis</i>              | 8.3  | Cirrhosis | 0.009959 |
| <i>Lactobacillus_fruventi</i>                 | 8.3  | Cirrhosis | 0.027295 |
| <i>Weissella_confusa</i>                      | 8.29 | Cirrhosis | 0.004171 |
| <i>Veillonella_parvula</i>                    | 8.28 | Cirrhosis | 1.49E-05 |
| <i>Lactobacillus_casei</i>                    | 8.27 | Cirrhosis | 3.19E-04 |
| <i>Lactobacillus_sakei</i>                    | 8.25 | Cirrhosis | 0.018473 |
| <i>Campylobacter_curvus</i>                   | 8.23 | Cirrhosis | 0.01526  |
| <i>Klebsiella_oxytoca</i>                     | 8.22 | Cirrhosis | 0.037517 |
| <i>Bifidobacterium_breve</i>                  | 8.19 | Cirrhosis | 0.018511 |
| <i>Veillonella_sp_6_1_27</i>                  | 8.18 | Cirrhosis | 4.22E-05 |
| <i>Selenomonas_artemidis</i>                  | 8.18 | Cirrhosis | 0.005542 |
| <i>Lactobacillus_parabuchneri</i>             | 8.15 | Cirrhosis | 0.018514 |
| <i>Klebsiella_quasivariicola</i>              | 8.13 | Cirrhosis | 0.004494 |
| <i>Lactobacillus_jensenii</i>                 | 8.13 | Cirrhosis | 0.0404   |
| <i>Lactobacillus_salivarius</i>               | 8.11 | Cirrhosis | 0.005428 |
| <i>Chryseobacterium_bovis</i>                 | 8.11 | Cirrhosis | 0.005552 |
| <i>Lactobacillus_fermentum</i>                | 8.09 | Cirrhosis | 3.09E-06 |
| <i>Lactobacillus_paracasei</i>                | 8.06 | Cirrhosis | 0.007183 |
| <i>Campylobacter_concicus</i>                 | 7.95 | Cirrhosis | 0.001426 |
| <i>Lactobacillus_sp_HMSC075D02</i>            | 7.93 | Cirrhosis | 0.00233  |
| <i>Fusobacterium_nucleatum</i>                | 7.9  | Cirrhosis | 0.017204 |
| <i>Acinetobacter_sp_WCHA34</i>                | 7.79 | Cirrhosis | 0.022489 |
| <i>Lactobacillus_coleohominis</i>             | 7.77 | Cirrhosis | 0.012465 |
| <i>Campylobacter_sp_10_1_50</i>               | 7.74 | Cirrhosis | 0.001847 |
| <i>Lactococcus_raffinolactis</i>              | 7.73 | Cirrhosis | 0.009143 |
| <i>Klebsiella_sp_A_Nf5</i>                    | 7.69 | Cirrhosis | 0.010239 |
| <i>Ruminococcaceae_bacterium_CPB6</i>         | 7.58 | Cirrhosis | 0.027773 |
| <i>Veillonella_rodentium</i>                  | 7.46 | Cirrhosis | 9.63E-04 |
| <i>Enterobacter_cloacae_complex_sp_ECNIH7</i> | 7.46 | Cirrhosis | 0.027184 |
| <i>Salmonella_enterica</i>                    | 7.43 | Cirrhosis | 0.003779 |
| <i>Enterobacter_hormaechei</i>                | 7.38 | Cirrhosis | 0.015208 |
| <i>Veillonella_atypica</i>                    | 7.35 | Cirrhosis | 4.22E-05 |
| <i>Veillonella_sp_HPAA0037</i>                | 7.22 | Cirrhosis | 2.57E-04 |
| <i>Arcobacter_butzleri</i>                    | 7.2  | Cirrhosis | 0.033017 |

|                                       |      |           |          |
|---------------------------------------|------|-----------|----------|
| <i>Enterococcus_italicus</i>          | 7.19 | Cirrhosis | 0.003612 |
| <i>Enterococcus_sp_HMSC064A12</i>     | 7.19 | Cirrhosis | 0.047826 |
| <i>Streptococcus_sp_HMSC066E07</i>    | 7.18 | Cirrhosis | 0.0102   |
| <i>Klebsiella_sp_HMSC16C06</i>        | 7.11 | Cirrhosis | 0.033026 |
| <i>Acidaminococcus_fermentans</i>     | 7.09 | Cirrhosis | 0.02494  |
| <i>Selenomonas_noxia</i>              | 7.08 | Cirrhosis | 0.048213 |
| <i>Moraxella_osloensis</i>            | 7.07 | Cirrhosis | 0.008387 |
| <i>Campylobacter_gracilis</i>         | 7.03 | Cirrhosis | 0.002533 |
| <i>Inediibacterium_massiliense</i>    | 6.99 | Cirrhosis | 0.027285 |
| <i>Klebsiella_sp_X1_16S_Nf21</i>      | 6.94 | Cirrhosis | 0.048084 |
| <i>Enterococcus_sp_HMSC035B04</i>     | 6.61 | Cirrhosis | 0.03958  |
| <i>Haemophilus_sp_oral_taxon_036</i>  | 6.58 | Cirrhosis | 0.010214 |
| <i>Citrobacter_sp_FDAARGOS_156</i>    | 6.55 | Cirrhosis | 0.033189 |
| <i>Veillonella_tobetsuensis</i>       | 6.51 | Cirrhosis | 0.001023 |
| <i>Klebsiella_quasipneumoniae</i>     | 6.32 | Cirrhosis | 0.001179 |
| <i>Veillonella_dispar</i>             | 6.24 | Cirrhosis | 5.45E-04 |
| <i>Selenomonas_sp_Marseille_P3560</i> | 6.17 | Cirrhosis | 0.048019 |
| <i>Escherichia_marmotae</i>           | 6.03 | Cirrhosis | 0.041039 |
| <i>Selenomonas_flueggei</i>           | 6.02 | Cirrhosis | 0.027242 |
| <i>Anaeroglobus_geminatus</i>         | 5.99 | Cirrhosis | 0.0111   |
| <i>Bifidobacterium_sp_TRE_H</i>       | 5.67 | Cirrhosis | 0.046728 |
| <i>Shigella_dysenteriae</i>           | 5.59 | Cirrhosis | 0.049692 |
| <i>Streptococcus_dysgalactiae</i>     | 5.55 | Cirrhosis | 0.032973 |
| <i>Streptococcus_vestibularis</i>     | 5.5  | Cirrhosis | 0.010483 |
| <i>Escherichia_albertii</i>           | 5.12 | Cirrhosis | 0.020809 |
| <i>Streptobacillus_moniliformis</i>   | 5.1  | Cirrhosis | 0.036412 |
| <i>Streptococcus_sp_DD10</i>          | 4.99 | Cirrhosis | 0.02943  |
| <i>Rothia_sp_HMSC065C03</i>           | 4.87 | Cirrhosis | 0.041329 |
| <i>Lactobacillus_ruminis</i>          | 4.86 | Cirrhosis | 1.83E-04 |
| <i>Escherichia_sp_KTE31</i>           | 4.75 | Cirrhosis | 0.013486 |
| <i>Anaerotruncus_sp_AT3</i>           | 4.72 | Cirrhosis | 0.026469 |
| <i>Lelliottia_amnigena</i>            | 4.64 | Cirrhosis | 0.013606 |
| <i>Rothia_sp_HMSC069D01</i>           | 4.59 | Cirrhosis | 0.002333 |
| <i>Streptococcus_sp_NPS_308</i>       | 4.48 | Cirrhosis | 0.015037 |
| <i>Atopobium_parvulum</i>             | 4.47 | Cirrhosis | 6.87E-04 |
| <i>Rothia_sp_HMSC062H08</i>           | 4.39 | Cirrhosis | 0.010541 |
| <i>Citrobacter_freundii</i>           | 4.38 | Cirrhosis | 0.001093 |
| <i>Rothia_sp_HMSC065C12</i>           | 4.38 | Cirrhosis | 0.045088 |
| <i>Escherichia_sp_1_1_43</i>          | 4.37 | Cirrhosis | 0.038322 |

|                                        |      |           |          |
|----------------------------------------|------|-----------|----------|
| <i>Streptococcus_sp_oral_taxon_071</i> | 4.33 | Cirrhosis | 0.041857 |
| <i>Rothia_sp_HMSC064F07</i>            | 4.29 | Cirrhosis | 0.009002 |
| <i>Rothia_sp_HMSC071C12</i>            | 4.24 | Cirrhosis | 0.006978 |
| <i>Rothia_sp_HMSC069C04</i>            | 4.2  | Cirrhosis | 0.011984 |
| <i>Streptococcus_sp_F0441</i>          | 4.13 | Cirrhosis | 0.019316 |
| <i>Kytococcus_sedentarius</i>          | 4.13 | Cirrhosis | 0.044445 |
| <i>Streptococcus_macedonicus</i>       | 4.1  | Cirrhosis | 0.029185 |
| <i>Rothia_sp_HMSC076D04</i>            | 4.09 | Cirrhosis | 0.028262 |
| <i>Rothia_sp_HMSC08A08</i>             | 4.08 | Cirrhosis | 0.016054 |
| <i>Rothia_sp_HMSC061D12</i>            | 4.06 | Cirrhosis | 0.029631 |
| <i>Rothia_sp_HMSC066G02</i>            | 4.03 | Cirrhosis | 0.025311 |
| <i>Clostridium_hylemonae</i>           | 4.01 | Cirrhosis | 0.013938 |
| <i>Rothia_sp_HMSC071F11</i>            | 3.96 | Cirrhosis | 0.013962 |
| <i>Rothia_sp_HMSC066G07</i>            | 3.94 | Cirrhosis | 0.012003 |
| <i>Rothia_sp_HMSC071B01</i>            | 3.92 | Cirrhosis | 0.00111  |
| <i>Rothia_mucilaginoso</i>             | 3.91 | Cirrhosis | 0.003078 |
| <i>Rothia_sp_HMSC075F09</i>            | 3.86 | Cirrhosis | 0.020462 |
| <i>Streptococcus_sp_HMSC076C09</i>     | 3.84 | Cirrhosis | 0.042837 |
| <i>Rothia_sp_HMSC068F09</i>            | 3.78 | Cirrhosis | 0.00183  |
| <i>Lachnospiraceae_bacterium_M18_1</i> | 3.76 | Cirrhosis | 0.007962 |
| <i>Rothia_sp_HMSC065G12</i>            | 3.75 | Cirrhosis | 0.010676 |
| <i>Rothia_sp_HMSC072B03</i>            | 3.69 | Cirrhosis | 0.009969 |
| <i>Rothia_sp_HMSC069C01</i>            | 3.61 | Cirrhosis | 0.028529 |
| <i>Clostridium_butyricum</i>           | 3.6  | Cirrhosis | 0.01555  |
| <i>Rothia_sp_HMSC036D11</i>            | 3.49 | Cirrhosis | 0.003687 |
| <i>Rothia_sp_HMSC065D02</i>            | 3.4  | Cirrhosis | 0.022872 |
| <i>Rothia_sp_HMSC072E10</i>            | 3.38 | Cirrhosis | 0.020296 |
| <i>Rothia_sp_HMSC065B04</i>            | 3.28 | Cirrhosis | 0.047892 |
| <i>Clostridium_disporicum</i>          | 3.21 | Cirrhosis | 0.017891 |
| <i>Bacteroides_eggerthii</i>           | 3.18 | Cirrhosis | 0.033532 |
| <i>Rothia_sp_HMSC062F03</i>            | 3.14 | Cirrhosis | 0.023502 |
| <i>Rothia_sp_HMSC078H08</i>            | 3.08 | Cirrhosis | 0.001796 |
| <i>Lachnoclostridium_phocaeense</i>    | 3.02 | Cirrhosis | 0.0024   |
| <i>Stomatobaculum_longum</i>           | 2.97 | Cirrhosis | 0.004073 |
| <i>Holdemania_massiliensis</i>         | 2.96 | Cirrhosis | 0.027128 |
| <i>Bacteroides_sp_Marseille_P3166</i>  | 2.83 | Cirrhosis | 0.003028 |
| <i>Bacteroides_clarus</i>              | 2.82 | Cirrhosis | 0.028529 |
| <i>Dielma_fastidiosa</i>               | 2.78 | Cirrhosis | 0.006394 |
| <i>Coprobaecillus_sp_29_1</i>          | 2.69 | Cirrhosis | 0.015189 |

|                                                    |      |           |          |
|----------------------------------------------------|------|-----------|----------|
| <i>Alistipes_sp_CHKCI003</i>                       | 2.68 | Cirrhosis | 0.005776 |
| <i>Clostridium_sp_AT4</i>                          | 2.65 | Cirrhosis | 0.039406 |
| <i>Neglecta_timonensis</i>                         | 2.64 | Cirrhosis | 0.040983 |
| <i>Clostridiales_bacterium_KA00274</i>             | 2.62 | Cirrhosis | 2.97E-04 |
| <i>Lachnospiraceae_bacterium_3_1_57FAA_CT1</i>     | 2.57 | Cirrhosis | 0.021633 |
| <i>Blautia_sp_Marseille_P2398</i>                  | 2.56 | Cirrhosis | 0.041312 |
| <i>Porphyromonas_gulae</i>                         | 2.55 | Cirrhosis | 0.016052 |
| <i>Holdemania_sp_Marseille_P2844</i>               | 2.54 | Cirrhosis | 0.026485 |
| <i>Clostridium_sp_ASF502</i>                       | 2.54 | Cirrhosis | 0.035232 |
| <i>Raoultibacter_timonensis</i>                    | 2.47 | Cirrhosis | 0.022131 |
| <i>Catonella_morbi</i>                             | 2.31 | Cirrhosis | 0.001883 |
| <i>Parabacteroides_sp_HGS0025</i>                  | 2.31 | Cirrhosis | 0.046793 |
| <i>Intestinibacillus_massiliensis</i>              | 2.29 | Cirrhosis | 0.01936  |
| <i>Campylobacter_sp_P0106</i>                      | 2.26 | Cirrhosis | 4.65E-04 |
| <i>Blautia_schinkii</i>                            | 2.23 | Cirrhosis | 0.049875 |
| <i>Candidatus_Saccharibacteria_oral_taxon_TM7x</i> | 2.21 | Cirrhosis | 0.001148 |
| <i>Clostridium_sp_KLE_1755</i>                     | 2.14 | Cirrhosis | 0.011819 |
| <i>Gemmiger_formicilis</i>                         | 2.14 | Cirrhosis | 0.047571 |
| <i>Alistipes_sp_Marseille_P5061</i>                | 2.1  | Cirrhosis | 0.014137 |
| <i>Pseudoflavonifractor_capillosus</i>             | 2.05 | Cirrhosis | 0.007214 |
| <i>Clostridium_sp_D5</i>                           | 2.04 | Cirrhosis | 0.028336 |
| <i>Gabonibacter_massiliensis</i>                   | 2.04 | Cirrhosis | 0.029357 |
| <i>Clostridium_leptum</i>                          | 2.03 | Cirrhosis | 0.024634 |
| <i>Eisenbergiella_massiliensis</i>                 | 2    | Cirrhosis | 0.002022 |
| <i>Lachnospiraceae_bacterium_28_4</i>              | 1.93 | Cirrhosis | 7.07E-04 |
| <i>Enterorhabdus_mucosicola</i>                    | 1.93 | Cirrhosis | 0.031004 |
| <i>Coprobacter_fastidiosus</i>                     | 1.92 | Cirrhosis | 0.010977 |
| <i>Coprococcus_eutactus</i>                        | 1.9  | Cirrhosis | 1.92E-04 |
| <i>Alistipes_putredinis</i>                        | 1.9  | Cirrhosis | 0.013632 |
| <i>Anaerotignum_lactatifermentans</i>              | 1.89 | Cirrhosis | 0.00312  |
| <i>Raoultibacter_massiliensis</i>                  | 1.89 | Cirrhosis | 0.044636 |
| <i>Asaccharospora_irregularis</i>                  | 1.87 | Cirrhosis | 8.89E-05 |
| <i>Eubacterium_limosum</i>                         | 1.87 | Cirrhosis | 0.022337 |
| <i>Bacteroides_oleiciplenus</i>                    | 1.86 | Cirrhosis | 0.02345  |
| <i>Roseburia_inulinivorans</i>                     | 1.85 | Cirrhosis | 0.024854 |
| <i>Lachnospiraceae_bacterium_2_1_58FAA</i>         | 1.85 | Cirrhosis | 0.035558 |
| <i>Anaeromassilibacillus_sp_Marseille_P3371</i>    | 1.83 | Cirrhosis | 2.85E-04 |
| <i>Lachnospiraceae_bacterium_3_1</i>               | 1.83 | Cirrhosis | 0.001213 |
| <i>Eubacterium_rectale</i>                         | 1.83 | Cirrhosis | 0.006041 |

|                                             |      |           |          |
|---------------------------------------------|------|-----------|----------|
| <i>Streptococcus_agalactiae</i>             | 1.83 | Cirrhosis | 0.032699 |
| <i>Ruminococcus_gauvreauii</i>              | 1.77 | Cirrhosis | 0.022625 |
| <i>Eggerthella_sp_YY7918</i>                | 1.75 | Cirrhosis | 0.001625 |
| <i>Gordonibacter_pamelaeae</i>              | 1.72 | Cirrhosis | 0.017637 |
| <i>Faecalicatena_contorta</i>               | 1.72 | Cirrhosis | 0.039341 |
| <i>Ileibacterium_massiliense</i>            | 1.71 | Cirrhosis | 0.00419  |
| <i>Ruminococcaceae_bacterium_cv2</i>        | 1.71 | Cirrhosis | 0.040961 |
| <i>Absiella_dolichum</i>                    | 1.69 | Cirrhosis | 3.32E-04 |
| <i>Bacteroides_sp_4_3_47FAA</i>             | 1.69 | Cirrhosis | 0.01438  |
| <i>Oribacterium_sp_oral_taxon_078</i>       | 1.69 | Cirrhosis | 0.039976 |
| <i>Coprobacillus_sp_8_1_38FAA</i>           | 1.67 | Cirrhosis | 2.98E-06 |
| <i>Bacteroides_stercoris</i>                | 1.67 | Cirrhosis | 0.006347 |
| <i>Butyricimonas_synergistica</i>           | 1.67 | Cirrhosis | 0.010905 |
| <i>Erysipelotrichaceae_bacterium_6_1_45</i> | 1.66 | Cirrhosis | 0.016479 |
| <i>Actinomyces_georgiae</i>                 | 1.65 | Cirrhosis | 0.046072 |
| <i>Enterorhabdus_caecimuris</i>             | 1.64 | Cirrhosis | 0.003032 |
| <i>Ruthenibacterium_lactatiformans</i>      | 1.63 | Cirrhosis | 0.005406 |
| <i>Anaerotignum_neopropionicum</i>          | 1.62 | Cirrhosis | 0.007533 |
| <i>Burkholderiales_bacterium_1_1_47</i>     | 1.62 | Cirrhosis | 0.009967 |
| <i>Eubacterium_sp_YI</i>                    | 1.62 | Cirrhosis | 0.039692 |
| <i>Bacteroides_sp_HMSC068A09</i>            | 1.6  | Cirrhosis | 0.004988 |
| <i>Blautia_sp_Marseille_P3201T</i>          | 1.6  | Cirrhosis | 0.005624 |
| <i>Clostridioides_difficile</i>             | 1.6  | Cirrhosis | 0.006857 |
| <i>Odoribacter_laneus</i>                   | 1.6  | Cirrhosis | 0.039495 |
| <i>Marvinbryantia_formatexigens</i>         | 1.59 | Cirrhosis | 0.001069 |
| <i>Ruminococcus_faecis</i>                  | 1.58 | Cirrhosis | 0.006605 |
| <i>Coprobacter_secundus</i>                 | 1.57 | Cirrhosis | 7.69E-05 |
| <i>Fusobacterium_naviforme</i>              | 1.57 | Cirrhosis | 4.34E-04 |
| <i>Streptococcus_pasteurianus</i>           | 1.57 | Cirrhosis | 5.50E-04 |
| <i>Lachnospiraceae_bacterium_7_1_58FAA</i>  | 1.56 | Cirrhosis | 0.010805 |
| <i>Anaerotruncus_sp_G32012</i>              | 1.56 | Cirrhosis | 0.027541 |
| <i>Lachnospiraceae_bacterium_A2</i>         | 1.55 | Cirrhosis | 0.017683 |
| <i>Fusicatenibacter_saccharivorans</i>      | 1.54 | Cirrhosis | 0.002023 |
| <i>Erysipelotrichaceae_bacterium_21_3</i>   | 1.54 | Cirrhosis | 0.018764 |
| <i>Johnsonella_ignava</i>                   | 1.53 | Cirrhosis | 0.006062 |
| <i>Oscillibacter_sp_1_3</i>                 | 1.53 | Cirrhosis | 0.007029 |
| <i>Roseburia_hominis</i>                    | 1.52 | Cirrhosis | 0.00641  |
| <i>Firmicutes_bacterium_ASF500</i>          | 1.52 | Cirrhosis | 0.023108 |
| <i>Adlercreutzia_equolifaciens</i>          | 1.5  | Cirrhosis | 0.004188 |

|                                                  |      |           |          |
|--------------------------------------------------|------|-----------|----------|
| <i>Peptoniphilus_asaccharolyticus</i>            | 1.5  | Cirrhosis | 0.01587  |
| <i>Provencibacterium_massiliense</i>             | 1.49 | Cirrhosis | 0.002226 |
| <i>Eubacterium_hallii</i>                        | 1.48 | Cirrhosis | 0.024022 |
| <i>Dorea_sp_5_2</i>                              | 1.46 | Cirrhosis | 2.18E-04 |
| <i>Ruminococcaceae_bacterium_Marseille_P2935</i> | 1.46 | Cirrhosis | 0.006034 |
| <i>Murdochiella_vaginalis</i>                    | 1.46 | Cirrhosis | 0.033735 |
| <i>Parabacteroides_sp_Marseille_P3668</i>        | 1.45 | Cirrhosis | 0.044412 |
| <i>Sharpea_azabuensis</i>                        | 1.44 | Cirrhosis | 8.92E-04 |
| <i>Clostridium_sp_SY8519</i>                     | 1.43 | Cirrhosis | 9.53E-04 |
| <i>Clostridium_sp_M62_1</i>                      | 1.41 | Cirrhosis | 0.003325 |
| <i>Blautia_sp_KLE_1732</i>                       | 1.39 | Cirrhosis | 0.014532 |
| <i>Catenibacterium_mitsuokai</i>                 | 1.37 | Cirrhosis | 0.004312 |
| <i>Alistipes_ihumii</i>                          | 1.37 | Cirrhosis | 0.007964 |
| <i>Bacteroides_gallinarum</i>                    | 1.37 | Cirrhosis | 0.010211 |
| <i>Bacteroides_fluxus</i>                        | 1.34 | Cirrhosis | 0.039964 |
| <i>Clostridium_sp_SN20</i>                       | 1.33 | Cirrhosis | 0.012776 |
| <i>Alistipes_sp_Marseille_P2431</i>              | 1.32 | Cirrhosis | 0.005285 |
| <i>Enterococcus_gilvus</i>                       | 1.32 | Cirrhosis | 0.012857 |
| <i>Coprococcus_comes</i>                         | 1.31 | Cirrhosis | 1.44E-04 |
| <i>Eubacterium_sp_SB2</i>                        | 1.3  | Cirrhosis | 0.0012   |
| <i>Clostridium_methylpentosum</i>                | 1.3  | Cirrhosis | 0.001506 |
| <i>Lachnospiraceae_bacterium_A4</i>              | 1.3  | Cirrhosis | 0.004676 |
| <i>Alistipes_shahii</i>                          | 1.3  | Cirrhosis | 0.012776 |
| <i>Subdoligranulum_sp_4_3_54A2FAA</i>            | 1.29 | Cirrhosis | 0.002804 |
| <i>Erysipelotrichaceae_bacterium_2_2_44A</i>     | 1.29 | Cirrhosis | 0.003494 |
| <i>Faecalibaculum_rodentium</i>                  | 1.26 | Cirrhosis | 1.07E-04 |
| <i>Roseburia_intestinalis</i>                    | 1.26 | Cirrhosis | 3.16E-04 |
| <i>Bacteroides_sp_Marseille_P3208T</i>           | 1.25 | Cirrhosis | 0.00989  |
| <i>Bittarella_massiliensis</i>                   | 1.24 | Cirrhosis | 0.001261 |
| <i>Streptococcus_orisratti</i>                   | 1.24 | Cirrhosis | 0.007857 |
| <i>Clostridium_saccharolyticum</i>               | 1.23 | Cirrhosis | 2.49E-05 |
| <i>Parasutterella_excrementihominis</i>          | 1.23 | Cirrhosis | 0.003624 |
| <i>Slackia_piriformis</i>                        | 1.23 | Cirrhosis | 0.033564 |
| <i>Catabacter_hongkongensis</i>                  | 1.22 | Cirrhosis | 0.014704 |
| <i>Treponema_porcinum</i>                        | 1.21 | Cirrhosis | 2.98E-05 |
| <i>Ruminococcus_sp_YE71</i>                      | 1.21 | Cirrhosis | 0.00235  |
| <i>Clostridium_sp_SS2_1</i>                      | 1.21 | Cirrhosis | 0.017985 |
| <i>Eubacterium_sp_14_2</i>                       | 1.2  | Cirrhosis | 3.88E-04 |
| <i>Clostridium_phoceensis</i>                    | 1.2  | Cirrhosis | 8.49E-04 |

|                                                |       |           |          |
|------------------------------------------------|-------|-----------|----------|
| <i>Murdochiella_massiliensis</i>               | 1.2   | Cirrhosis | 0.002364 |
| <i>Ruminococcus_torques</i>                    | 1.18  | Cirrhosis | 0.002896 |
| <i>Fournierella_massiliensis</i>               | 1.17  | Cirrhosis | 5.38E-05 |
| <i>Alistipes_finegoldii</i>                    | 1.17  | Cirrhosis | 0.027967 |
| <i>Eubacterium_eligens</i>                     | 1.16  | Cirrhosis | 0.002657 |
| <i>Bacteroides_salanitronis</i>                | 1.15  | Cirrhosis | 5.67E-04 |
| <i>Peptoniphilus_phoceensis</i>                | 1.15  | Cirrhosis | 0.003342 |
| <i>Bariatricus_massiliensis</i>                | 1.14  | Cirrhosis | 0.005362 |
| <i>Faecalibacterium_prausnitzii</i>            | 1.13  | Cirrhosis | 6.86E-04 |
| <i>Bulleidia_extracta</i>                      | 1.13  | Cirrhosis | 0.005676 |
| <i>Alistipes_onderdonkii</i>                   | 1.13  | Cirrhosis | 0.016186 |
| <i>Lachnoanaerobaculum_saburreum</i>           | 1.12  | Cirrhosis | 7.40E-04 |
| <i>Lactobacillus_rogosae</i>                   | 1.11  | Cirrhosis | 7.34E-04 |
| <i>Fusicatenibacter_sp_2789STDY5834925</i>     | 1.11  | Cirrhosis | 7.96E-04 |
| <i>Phascolarctobacterium_succinatutens</i>     | 1.11  | Cirrhosis | 0.032608 |
| <i>Blautia_sp_SF_50</i>                        | 1.11  | Cirrhosis | 0.042644 |
| <i>Sutterella_sp_KLE1602</i>                   | 1.1   | Cirrhosis | 0.013667 |
| <i>Ruminococcus_sp_AT10</i>                    | 1.09  | Cirrhosis | 4.23E-04 |
| <i>Lachnospiraceae_bacterium_1_1_57FAA</i>     | 1.08  | Cirrhosis | 0.002734 |
| <i>Holdemania_filiformis</i>                   | 1.08  | Cirrhosis | 0.004687 |
| <i>Anaerotruncus_colihominis</i>               | 1.07  | Cirrhosis | 5.26E-04 |
| <i>Acetivibrio_ethanolgignens</i>              | 1.06  | Cirrhosis | 0.001115 |
| <i>Anaerofustis_stercorihominis</i>            | 1.05  | Cirrhosis | 0.011573 |
| <i>Parabacteroides_sp_CT06</i>                 | 1.04  | Cirrhosis | 0.013025 |
| <i>Coprococcus_sp_HPP0048</i>                  | 1.03  | Cirrhosis | 0.026669 |
| <i>Pseudoflavonifractor_sp_Marseille_P3106</i> | 1.02  | Cirrhosis | 5.79E-04 |
| <i>Bacteroides_nordii</i>                      | -1    | Control   | 0.023214 |
| <i>Monoglobus_pectinilyticus</i>               | -1.37 | Control   | 1.92E-05 |
| <i>Alistipes_inops</i>                         | -1.4  | Control   | 0.017719 |
| <i>Bacteroides_coprocola</i>                   | -1.87 | Control   | 0.029882 |
| <i>Faecalitalea_cylindroides</i>               | -1.95 | Control   | 5.00E-04 |
| <i>Lachnobacterium_bovis</i>                   | -2.58 | Control   | 4.79E-04 |
| <i>Butyrivibrio_crossotus</i>                  | -2.77 | Control   | 5.30E-04 |
| <i>Ruminococcus_champanellensis</i>            | -2.78 | Control   | 2.66E-06 |

**Table S3: DESeq2 Comparison of Resistomes Control vs Cirrhosis**

| Resistomes Lineage                | LOG2FC | Direction | pvalue   |
|-----------------------------------|--------|-----------|----------|
| <i>Klebsiella_sp</i>              | 8.79   | Cirrhosis | 8.01E-04 |
| <i>Exiguobacterium_sp</i>         | 7.94   | Cirrhosis | 0.002848 |
| <i>Serratia_marcescens</i>        | 5.46   | Cirrhosis | 1.01E-06 |
| <i>Haemophilus_influenzae</i>     | 5.08   | Cirrhosis | 0.001338 |
| <i>Streptococcus_oralis</i>       | 4.92   | Cirrhosis | 0.00466  |
| <i>Vibrio_paraahaemolyticus</i>   | 4.62   | Cirrhosis | 1.41E-05 |
| <i>Riemerella_anatipestifer</i>   | 4.3    | Cirrhosis | 0.019943 |
| <i>Streptococcus_australis</i>    | 4.29   | Cirrhosis | 4.12E-05 |
| <i>Acinetobacter_nosocomialis</i> | 3.95   | Cirrhosis | 6.46E-04 |
| <i>Streptococcus_pneumoniae</i>   | 3.83   | Cirrhosis | 0.037213 |
| <i>Salmonella_enterica</i>        | 3.61   | Cirrhosis | 0.003114 |
| <i>Enterococcus_faecium</i>       | 3.61   | Cirrhosis | 0.0114   |
| <i>Achromobacter_insuaavis</i>    | 3.57   | Cirrhosis | 0.03141  |
| <i>Staphylococcus_aureus</i>      | 3.56   | Cirrhosis | 1.82E-04 |
| <i>Escherichia_coli</i>           | 3.09   | Cirrhosis | 0.001287 |
| <i>Citrobacter_amalonaticus</i>   | 3.08   | Cirrhosis | 0.023368 |
| <i>Mycobacterium_tuberculosis</i> | 3.06   | Cirrhosis | 0.016948 |
| <i>Citrobacter_freundii</i>       | 2.86   | Cirrhosis | 9.73E-04 |
| <i>Klebsiella_pneumoniae</i>      | 2.82   | Cirrhosis | 0.009835 |
| <i>Acinetobacter_baumannii</i>    | 2.78   | Cirrhosis | 0.015969 |
| <i>Acidaminococcus_fermentans</i> | 2.15   | Cirrhosis | 0.023939 |
| <i>uncultured_bacterium</i>       | 1.17   | Cirrhosis | 0.002329 |
| <i>Campylobacter_fetus</i>        | 1.12   | Cirrhosis | 0.045666 |
| <i>mixed_culture</i>              | 1.05   | Cirrhosis | 0.023757 |

**Table S4: DESeq2 Comparison of ARO terms Control vs Cirrhosis**

| Lineage DESeq2               | LOG2FC | Direction | pvalue   |
|------------------------------|--------|-----------|----------|
| aadA16                       | 7.98   | Cirrhosis | 2.38E-05 |
| CTX_M_76                     | 7.79   | Cirrhosis | 0.01756  |
| efmA                         | 7.58   | Cirrhosis | 0.001967 |
| CTX_M_117                    | 7.48   | Cirrhosis | 3.16E-06 |
| SHV_160                      | 6.89   | Cirrhosis | 7.60E-05 |
| QnrB8                        | 6.88   | Cirrhosis | 3.12E-06 |
| ANT_3_Ila                    | 6.4    | Cirrhosis | 2.98E-05 |
| CTX_M_50                     | 6.34   | Cirrhosis | 1.00E-06 |
| Klebsiella_pneumoniae_KpnG   | 6.16   | Cirrhosis | 1.00E-06 |
| tet_45                       | 5.98   | Cirrhosis | 9.52E-05 |
| FosA5                        | 5.93   | Cirrhosis | 0.001071 |
| RlmA_II                      | 5.87   | Cirrhosis | 0.00239  |
| aadA                         | 5.6    | Cirrhosis | 0.011444 |
| FosA6                        | 5.58   | Cirrhosis | 0.00256  |
| vanD                         | 5.55   | Cirrhosis | 0.021856 |
| TEM_205                      | 5.46   | Cirrhosis | 5.41E-05 |
| oqxA                         | 5.4    | Cirrhosis | 1.80E-06 |
| Klebsiella_pneumoniae_acrA   | 5.35   | Cirrhosis | 3.36E-05 |
| AAC_6_Ib10                   | 5.22   | Cirrhosis | 0.001958 |
| sul1                         | 5.2    | Cirrhosis | 1.30E-04 |
| mphB                         | 5.18   | Cirrhosis | 3.87E-06 |
| vanSA                        | 5.06   | Cirrhosis | 0.018476 |
| catI                         | 4.98   | Cirrhosis | 1.21E-06 |
| FosA2                        | 4.97   | Cirrhosis | 0.031619 |
| pmrA                         | 4.93   | Cirrhosis | 0.013391 |
| tet_C                        | 4.88   | Cirrhosis | 4.05E-06 |
| ramA                         | 4.87   | Cirrhosis | 3.29E-04 |
| aadA8b                       | 4.85   | Cirrhosis | 0.032478 |
| aadA24                       | 4.79   | Cirrhosis | 0.04115  |
| Klebsiella_pneumoniae_OmpK37 | 4.6    | Cirrhosis | 1.04E-06 |
| TEM_40                       | 4.56   | Cirrhosis | 0.004099 |
| mphA                         | 4.55   | Cirrhosis | 0.006717 |
| TEM_102                      | 4.55   | Cirrhosis | 0.02493  |
| SRT_2                        | 4.38   | Cirrhosis | 0.040797 |
| AAC_3_IV                     | 4.31   | Cirrhosis | 0.005449 |
| SHV_11                       | 4.21   | Cirrhosis | 0.022617 |
| tet_D                        | 4.16   | Cirrhosis | 5.46E-04 |
| patA                         | 4.14   | Cirrhosis | 0.019495 |
| Klebsiella_pneumoniae_KpnH   | 4.12   | Cirrhosis | 1.24E-06 |
| Enterobacter_cloacae_acrA    | 4.04   | Cirrhosis | 0.006217 |
| EreD                         | 4.03   | Cirrhosis | 0.014354 |
| tetA_46                      | 3.86   | Cirrhosis | 0.001434 |
| tet_A                        | 3.73   | Cirrhosis | 0.003181 |

|                                       |      |           |          |
|---------------------------------------|------|-----------|----------|
| tetB_46                               | 3.72 | Cirrhosis | 0.00363  |
| H_NS                                  | 3.64 | Cirrhosis | 1.30E-04 |
| Klebsiella_pneumoniae_KpnF            | 3.64 | Cirrhosis | 4.50E-04 |
| AAC_6_Ib7                             | 3.64 | Cirrhosis | 0.043031 |
| oqxB                                  | 3.61 | Cirrhosis | 5.23E-04 |
| APH_6_Id                              | 3.55 | Cirrhosis | 3.97E-04 |
| cpxA                                  | 3.47 | Cirrhosis | 2.46E-04 |
| mdtM                                  | 3.47 | Cirrhosis | 0.001144 |
| Klebsiella_pneumoniae_KpnE            | 3.43 | Cirrhosis | 3.96E-06 |
| SAT_1                                 | 3.43 | Cirrhosis | 0.013674 |
| sul2                                  | 3.42 | Cirrhosis | 3.07E-04 |
| APH_3_Ib                              | 3.41 | Cirrhosis | 4.24E-05 |
| emrA                                  | 3.41 | Cirrhosis | 0.001773 |
| Escherichia_coli_ampH                 | 3.38 | Cirrhosis | 0.001227 |
| mdtC                                  | 3.36 | Cirrhosis | 4.17E-05 |
| mdtH                                  | 3.36 | Cirrhosis | 0.001207 |
| marA                                  | 3.36 | Cirrhosis | 0.002196 |
| pmrF                                  | 3.35 | Cirrhosis | 0.001038 |
| bacA                                  | 3.31 | Cirrhosis | 4.60E-04 |
| mdtB                                  | 3.3  | Cirrhosis | 3.19E-04 |
| gadX                                  | 3.28 | Cirrhosis | 6.09E-04 |
| Escherichia_coli_mdfA                 | 3.28 | Cirrhosis | 0.00198  |
| arnA                                  | 3.28 | Cirrhosis | 0.002518 |
| aadA22                                | 3.28 | Cirrhosis | 0.049927 |
| CRP                                   | 3.24 | Cirrhosis | 0.001963 |
| Tet_X4                                | 3.22 | Cirrhosis | 0.008158 |
| mdtK                                  | 3.21 | Cirrhosis | 0.002943 |
| tolC                                  | 3.16 | Cirrhosis | 0.005914 |
| mdtN                                  | 3.13 | Cirrhosis | 0.009376 |
| Escherichia_coli_emrE                 | 3.13 | Cirrhosis | 0.014692 |
| Escherichia_coli_ampC1_beta_lactamase | 3.12 | Cirrhosis | 0.01132  |
| Tet_X3                                | 3.11 | Cirrhosis | 0.016357 |
| yojI                                  | 3.09 | Cirrhosis | 0.001309 |
| aadS                                  | 3.09 | Cirrhosis | 0.032282 |
| acrB                                  | 3.06 | Cirrhosis | 0.006765 |
| acrE                                  | 3.05 | Cirrhosis | 0.014596 |
| mdtG                                  | 3.02 | Cirrhosis | 0.018732 |
| mdtP                                  | 3.01 | Cirrhosis | 0.018393 |
| acrS                                  | 3.01 | Cirrhosis | 0.024064 |
| mdtA                                  | 3    | Cirrhosis | 0.009166 |
| acrF                                  | 3    | Cirrhosis | 0.019808 |
| emrR                                  | 2.99 | Cirrhosis | 0.004823 |
| eptA                                  | 2.97 | Cirrhosis | 0.027021 |
| baeS                                  | 2.95 | Cirrhosis | 0.024986 |
| emrB                                  | 2.92 | Cirrhosis | 0.028064 |
| evgS                                  | 2.88 | Cirrhosis | 0.023217 |

|        |       |           |          |
|--------|-------|-----------|----------|
| acrD   | 2.87  | Cirrhosis | 0.02227  |
| arIS   | 2.76  | Cirrhosis | 0.043254 |
| mphE   | 2.66  | Cirrhosis | 0.039672 |
| mdtO   | 2.64  | Cirrhosis | 0.040901 |
| kdpE   | 2.63  | Cirrhosis | 0.030919 |
| tIrC   | 1.26  | Cirrhosis | 0.024299 |
| MexB   | 1.26  | Cirrhosis | 0.039048 |
| CblA_1 | 1.11  | Cirrhosis | 0.035662 |
| vanSG  | -1.13 | Control   | 7.18E-06 |
| vanXYG | -1.29 | Control   | 1.00E-06 |

**Table S5: DESeq2 Comparison of AMR genes Control vs Cirrhosis**

| Lineage (DESeq2)                                                  | LOG2FC | Direction | pvalue   |
|-------------------------------------------------------------------|--------|-----------|----------|
| quinolone_resistance_protein_qnr                                  | 6.75   | Cirrhosis | 1.02E-06 |
| KPC_beta_lactamase                                                | 6.38   | Cirrhosis | 0.025915 |
| CTX_M_beta_lactamase                                              | 5.73   | Cirrhosis | 1.00E-06 |
| fosfomycin_thiol_transferase                                      | 5.56   | Cirrhosis | 5.61E-06 |
| non_erm_23S_ribosomal_RNA_methyltransferase_G748                  | 5.03   | Cirrhosis | 0.012382 |
| ANT_3                                                             | 4.63   | Cirrhosis | 1.00E-06 |
| General_Bacterial_Porin_with_reduced_permeability_to_beta_lactams | 4.35   | Cirrhosis | 1.49E-06 |
| CMY_beta_lactamase                                                | 4.18   | Cirrhosis | 0.035015 |
| blaZ_beta_lactamase                                               | 4.16   | Cirrhosis | 0.024347 |
| sulfonamide_resistant_sul                                         | 4.06   | Cirrhosis | 3.13E-04 |
| SHV_beta_lactamase                                                | 3.14   | Cirrhosis | 7.77E-04 |
| macrolide_phosphotransferase_MPH                                  | 3.13   | Cirrhosis | 0.011087 |
| streptothricin_acetyltransferase_SAT                              | 3.12   | Cirrhosis | 0.003593 |
| antibiotic_resistant_oleucyl_tRNA_synthetase_ileS                 | 3.08   | Cirrhosis | 0.018339 |
| APH_3                                                             | 3.05   | Cirrhosis | 0.002415 |
| undecaprenyl_pyrophosphate_related_proteins                       | 2.79   | Cirrhosis | 0.019842 |
| ATP_binding_cassette_ABC_antibiotic_efflux_pump                   | 2.72   | Cirrhosis | 3.39E-04 |
| resistance_nodulation_cell_division_RND_antibiotic_efflux_pump    | 2.5    | Cirrhosis | 0.012729 |
| ACI_beta_lactamase                                                | 2      | Cirrhosis | 0.001094 |
| tetracycline_resistant_ribosomal_protection_protein               | 1.3    | Cirrhosis | 0.003761 |
| glycopeptide_resistance_gene_cluster                              | 1.24   | Cirrhosis | 0.001917 |

**Table S6: Kruskal-Wallis Comparison of No HE versus Prior HE Bacterial Species**

| Lineage                                 | LOG2FC | Direction | pvalue   |
|-----------------------------------------|--------|-----------|----------|
| <i>Clostridium_sphenoides</i>           | -12.71 | Prior HE  | 0.027112 |
| <i>Hafnia_sp_HMSC23F03</i>              | -11.05 | Prior HE  | 0.041813 |
| <i>Lactobacillus_sp_HMSC08B12</i>       | -9.43  | Prior HE  | 0.02713  |
| <i>Neisseria_bacilliformis</i>          | -8.57  | Prior HE  | 0.017542 |
| <i>Enterococcus_casseliflavus</i>       | -7.48  | Prior HE  | 0.027138 |
| <i>Lactobacillus_sp_HMSC061B07</i>      | -7.44  | Prior HE  | 0.007254 |
| <i>Lactobacillus_acidophilus</i>        | -7.35  | Prior HE  | 0.006721 |
| <i>Pediococcus_clausenii</i>            | -7.16  | Prior HE  | 0.017491 |
| <i>Lactobacillus_sp_HMSC078F07</i>      | -7.15  | Prior HE  | 0.02714  |
| <i>Enterococcus_sp_HMSC063H10</i>       | -7.07  | Prior HE  | 0.041849 |
| <i>Inediibacterium_massiliense</i>      | -6.99  | Prior HE  | 2.75E-04 |
| <i>Lactobacillus_sp_HMSC068B07</i>      | -6.8   | Prior HE  | 0.007601 |
| <i>Enterococcus_sp_255_ESPC</i>         | -6.7   | Prior HE  | 0.041853 |
| <i>Enterococcus_sp_HMSC035B04</i>       | -6.58  | Prior HE  | 0.001833 |
| <i>Lactobacillus_sp_HMSC056D05</i>      | -6.36  | Prior HE  | 0.029378 |
| <i>Lactobacillus_sp_HMSC077C11</i>      | -6.28  | Prior HE  | 0.005373 |
| <i>Lactobacillus_paracasei</i>          | -6.15  | Prior HE  | 0.015794 |
| <i>Escherichia_sp_KTE96</i>             | -6.07  | Prior HE  | 0.041845 |
| <i>Lactobacillus_delbrueckii</i>        | -5.87  | Prior HE  | 2.65E-04 |
| <i>Neisseria_lactamica</i>              | -5.67  | Prior HE  | 0.041809 |
| <i>Bifidobacterium_sp_TRE_D</i>         | -5.64  | Prior HE  | 0.004635 |
| <i>Bifidobacterium_mongoliense</i>      | -5.52  | Prior HE  | 0.041849 |
| <i>Paeniglutamicibacter_antarcticus</i> | -5.49  | Prior HE  | 0.0113   |
| <i>Bifidobacterium_callitrichos</i>     | -5.29  | Prior HE  | 0.017516 |
| <i>Bifidobacterium_sp_TRE_1</i>         | -5.29  | Prior HE  | 0.027135 |
| <i>Bifidobacterium_aesculapii</i>       | -5.22  | Prior HE  | 0.03331  |
| <i>Lactobacillus_rossiae</i>            | -5.04  | Prior HE  | 0.007252 |
| <i>Bifidobacterium_subtile</i>          | -5     | Prior HE  | 0.027135 |
| <i>Streptococcus_sp_M334</i>            | -4.89  | Prior HE  | 0.001045 |
| <i>Weissella_sp_DD23</i>                | -4.81  | Prior HE  | 0.017541 |
| <i>Bifidobacterium_reuteri</i>          | -4.78  | Prior HE  | 0.001452 |
| <i>Leuconostoc_mesenteroides</i>        | -4.68  | Prior HE  | 0.019226 |
| <i>Bifidobacterium_lemurum</i>          | -4.64  | Prior HE  | 0.027128 |
| <i>Bifidobacterium_sp_TRE_H</i>         | -4.62  | Prior HE  | 0.00739  |
| <i>Kingella_oralis</i>                  | -4.61  | Prior HE  | 0.046563 |
| <i>Streptococcus_sp_HMSC076C08</i>      | -4.58  | Prior HE  | 0.027089 |
| <i>Leptospira_sp_JW3_C_A1</i>           | -4.46  | Prior HE  | 0.011288 |

|                                        |       |          |          |
|----------------------------------------|-------|----------|----------|
| <i>Megasphaera_micronuciformis</i>     | -4.44 | Prior HE | 0.030664 |
| <i>Campylobacter_showae</i>            | -4.32 | Prior HE | 0.041845 |
| <i>Blautia_producta</i>                | -4.28 | Prior HE | 6.51E-05 |
| <i>Bifidobacterium_saguini</i>         | -4.25 | Prior HE | 0.00205  |
| <i>Aerococcus_sp_HMSC23C02</i>         | -4.25 | Prior HE | 0.027133 |
| <i>Colwellia_echini</i>                | -4.17 | Prior HE | 0.027133 |
| <i>Bifidobacterium_breve</i>           | -3.94 | Prior HE | 0.00964  |
| <i>Streptococcus_sp_HMSC077D04</i>     | -3.59 | Prior HE | 0.002638 |
| <i>Veillonella_sp_6_1_27</i>           | -3.58 | Prior HE | 0.022356 |
| <i>Veillonella_parvula</i>             | -3.56 | Prior HE | 0.023193 |
| <i>Streptococcus_sp_oral_taxon_058</i> | -3.54 | Prior HE | 0.00158  |
| <i>Veillonella_sp_3_1_44</i>           | -3.51 | Prior HE | 0.024751 |
| <i>Streptococcus_sp_CCUG_49591</i>     | -3.5  | Prior HE | 0.02017  |
| <i>Parvimonas_micra</i>                | -3.48 | Prior HE | 0.043364 |
| <i>Bifidobacterium_longum</i>          | -3.44 | Prior HE | 0.016517 |
| <i>Lautropia_mirabilis</i>             | -3.42 | Prior HE | 0.01015  |
| <i>Bifidobacterium_sp_12_1_47BFAA</i>  | -3.38 | Prior HE | 0.03324  |
| <i>Streptococcus_sp_HMSC073F11</i>     | -3.37 | Prior HE | 0.011038 |
| <i>Streptococcus_sp_F0441</i>          | -3.35 | Prior HE | 0.038454 |
| <i>Streptococcus_mitis</i>             | -3.27 | Prior HE | 0.004997 |
| <i>Streptococcus_sp_HMSC070B10</i>     | -3.26 | Prior HE | 0.03203  |
| <i>Veillonella_rodentium</i>           | -3.24 | Prior HE | 0.03528  |
| <i>Campylobacter_curvus</i>            | -3.23 | Prior HE | 0.039533 |
| <i>Streptococcus_sp_NLAE_zl_C503</i>   | -2.99 | Prior HE | 0.021089 |
| <i>Oxalobacter_formigenes</i>          | -2.95 | Prior HE | 0.018667 |
| <i>Streptococcus_sp_UMB0029</i>        | -2.94 | Prior HE | 0.035476 |
| <i>Coprobacillus_sp_8_1_38FAA</i>      | -2.93 | Prior HE | 0.024559 |
| <i>Streptococcus_sp_HMSC063B03</i>     | -2.92 | Prior HE | 0.029331 |
| <i>Streptococcus_pseudopneumoniae</i>  | -2.83 | Prior HE | 0.021052 |
| <i>Gabonia_massiliensis</i>            | -2.59 | Prior HE | 0.008626 |
| <i>Asaccharospora_irregularis</i>      | -2.43 | Prior HE | 0.034456 |
| <i>Clostridium_butyricum</i>           | -2.41 | Prior HE | 0.019365 |
| <i>Streptococcus_pneumoniae</i>        | -2.33 | Prior HE | 0.026626 |
| <i>Veillonella_atypica</i>             | -2.11 | Prior HE | 0.003229 |
| <i>Campylobacter_sp_10_1_50</i>        | -2.05 | Prior HE | 0.001687 |
| <i>Olsenella_provencensis</i>          | -2.05 | Prior HE | 0.035881 |
| <i>Veillonella_tobetsuensis</i>        | -2.04 | Prior HE | 0.004597 |
| <i>Campylobacter_concisus</i>          | -1.99 | Prior HE | 0.002245 |
| <i>Veillonella_sp_HPA0037</i>          | -1.99 | Prior HE | 0.006568 |

|                                             |       |          |          |
|---------------------------------------------|-------|----------|----------|
| <i>Lactobacillus fermentum</i>              | -1.96 | Prior HE | 0.003434 |
| <i>Veillonella dispar</i>                   | -1.95 | Prior HE | 0.040455 |
| <i>Sutterella wadsworthensis</i>            | -1.89 | Prior HE | 0.00992  |
| <i>Clostridium sp_L2_50</i>                 | -1.82 | Prior HE | 0.008786 |
| <i>Clostridium bolteae</i>                  | -1.77 | Prior HE | 0.014293 |
| <i>Prevotella amnii</i>                     | -1.54 | Prior HE | 0.03658  |
| <i>Tannerella sp_oral_taxon_HOT_286</i>     | -1.51 | Prior HE | 0.024385 |
| <i>Bacteroides paurosaccharolyticus</i>     | -1.5  | Prior HE | 0.010049 |
| <i>Mogibacterium diversum</i>               | -1.44 | Prior HE | 0.032918 |
| <i>Intestinibacillus massiliensis</i>       | -1.42 | Prior HE | 0.002908 |
| <i>Alistipes sp_CHKCI003</i>                | -1.42 | Prior HE | 0.046751 |
| <i>Lachnospiraceae bacterium_2_1_46FAA</i>  | -1.34 | Prior HE | 0.00197  |
| <i>Olsenella umbonata</i>                   | -1.33 | Prior HE | 0.046302 |
| <i>Clostridium disporicum</i>               | -1.26 | Prior HE | 0.001283 |
| <i>Absiella dolichum</i>                    | -1.25 | Prior HE | 0.022078 |
| <i>Holdemania massiliensis</i>              | -1.12 | Prior HE | 0.008361 |
| <i>Ruminococcaceae bacterium_D16</i>        | -1.04 | Prior HE | 0.028704 |
| <i>Bifidobacterium scardovii</i>            | -1.01 | Prior HE | 0.003206 |
| <i>Bacteroides sp_AR20</i>                  | 1     | No HE    | 0.001628 |
| <i>bacterium_LF_3</i>                       | 1.03  | No HE    | 0.00997  |
| <i>Tyzzereella nexilis</i>                  | 1.1   | No HE    | 7.75E-05 |
| <i>Coprococcus sp_HPP0048</i>               | 1.11  | No HE    | 3.11E-05 |
| <i>Clostridium sp_HMSC19A11</i>             | 1.11  | No HE    | 2.22E-04 |
| <i>Peptoniphilus sp_HMSC062D09</i>          | 1.11  | No HE    | 0.004956 |
| <i>Lachnospiraceae bacterium_1_4_56FAA</i>  | 1.16  | No HE    | 7.24E-05 |
| <i>Emergencia timonensis</i>                | 1.17  | No HE    | 0.025267 |
| <i>Clostridium leptum</i>                   | 1.18  | No HE    | 3.05E-04 |
| <i>Eisenbergiella massiliensis</i>          | 1.22  | No HE    | 0.002074 |
| <i>Bacteroides thetaiotaomicron</i>         | 1.27  | No HE    | 0.019027 |
| <i>Christensenella timonensis</i>           | 1.29  | No HE    | 0.038347 |
| <i>Lachnospiraceae bacterium_9_1_43BFAA</i> | 1.36  | No HE    | 1.19E-04 |
| <i>Ileibacterium massiliense</i>            | 1.36  | No HE    | 1.48E-04 |
| <i>Clostridium sp_AT4</i>                   | 1.39  | No HE    | 6.98E-04 |
| <i>Prevotella falsenii</i>                  | 1.4   | No HE    | 0.004245 |
| <i>Gabonibacter massiliensis</i>            | 1.42  | No HE    | 0.015268 |
| <i>Enorma phocaeensis</i>                   | 1.47  | No HE    | 0.01169  |
| <i>Enterococcus cecorum</i>                 | 1.49  | No HE    | 0.034486 |
| <i>Bariatricus massiliensis</i>             | 1.5   | No HE    | 0.010063 |
| <i>Coprococcus sp_HPP0074</i>               | 1.6   | No HE    | 2.40E-04 |

|                                                |       |       |          |
|------------------------------------------------|-------|-------|----------|
| <i>Clostridium_sp_KLE_1755</i>                 | 1.6   | No HE | 9.16E-04 |
| <i>Lachnospiraceae_bacterium_A4</i>            | 1.65  | No HE | 7.71E-06 |
| <i>Holdemania_sp_Marseille_P2844</i>           | 1.77  | No HE | 0.002152 |
| <i>Ruminococcus_gauvreauii</i>                 | 1.78  | No HE | 8.37E-08 |
| <i>Adlercreutzia_equolifaciens</i>             | 1.82  | No HE | 0.002855 |
| <i>Alistipes_inops</i>                         | 1.83  | No HE | 0.001675 |
| <i>Enterococcus_gilvus</i>                     | 2.07  | No HE | 0.016756 |
| <i>Clostridiales_bacterium_CHKCI001</i>        | 2.09  | No HE | 0.01463  |
| <i>Lachnospiraceae_bacterium_M18_1</i>         | 2.14  | No HE | 0.004674 |
| <i>Dielma_fastidiosa</i>                       | 2.15  | No HE | 0.004401 |
| <i>Cloacibacillus_porcorum</i>                 | 2.38  | No HE | 0.008659 |
| <i>Enorma_massiliensis</i>                     | 2.39  | No HE | 5.56E-04 |
| <i>Ruminococcaceae_bacterium_D5</i>            | 2.5   | No HE | 0.009786 |
| <i>Negativibacillus_massiliensis</i>           | 2.59  | No HE | 9.39E-05 |
| <i>Eubacterium_callanderi</i>                  | 2.73  | No HE | 3.39E-04 |
| <i>Senegalimassilia_anaerobia</i>              | 2.94  | No HE | 8.97E-04 |
| <i>Clostridium_scindens</i>                    | 2.96  | No HE | 3.60E-04 |
| <i>Lachnoclostridium_phocaeense</i>            | 3     | No HE | 0.000674 |
| <i>Lachnospira_multipara</i>                   | 3     | No HE | 0.030754 |
| <i>Collinsella_ihuae</i>                       | 3.27  | No HE | 0.006426 |
| <i>Streptococcus_pyogenes</i>                  | 3.77  | No HE | 0.032948 |
| <i>Fusobacterium_perfoetens</i>                | 4.17  | No HE | 0.030754 |
| <i>Clostridiales_bacterium_Marseille_P2846</i> | 4.32  | No HE | 0.015309 |
| <i>Citrobacter_portucalensis</i>               | 4.75  | No HE | 0.012085 |
| <i>Megasphaera_elsdenii</i>                    | 5.11  | No HE | 0.036244 |
| <i>Kluyvera_cryocrescens</i>                   | 8.2   | No HE | 5.94E-04 |
| <i>Prevotella_sp_oral_taxon_299</i>            | 8.4   | No HE | 0.030754 |
| <i>Enterobacter_sp_BIDMC_29</i>                | 10.08 | No HE | 0.015211 |
| <i>Megasphaera_sp_ASD88</i>                    | 10.45 | No HE | 0.012075 |
| <i>Kluyvera_ascorbata</i>                      | 10.57 | No HE | 0.012279 |

**Table S7: DESeq2 Comparison of ARO terms No HE vs Prior HE**

| Lineage                                                          | LOG2FC | Direction | pvalue   |
|------------------------------------------------------------------|--------|-----------|----------|
| tetU                                                             | -6.62  | Prior HE  | 1.64E-05 |
| ErmX                                                             | -4.21  | Prior HE  | 0.017726 |
| tetS                                                             | -4.02  | Prior HE  | 0.028251 |
| vanZA                                                            | -3.77  | Prior HE  | 0.001993 |
| efmA                                                             | -3.7   | Prior HE  | 0.001209 |
| vanRA                                                            | -3.11  | Prior HE  | 0.022796 |
| vanD                                                             | -3.05  | Prior HE  | 0.026556 |
| CTX_M_76                                                         | -2.93  | Prior HE  | 6.49E-04 |
| vanHD                                                            | -2.87  | Prior HE  | 0.012827 |
| vanSA                                                            | -2.7   | Prior HE  | 1.77E-04 |
| tet44                                                            | -2.38  | Prior HE  | 0.010112 |
| MexA                                                             | -2.21  | Prior HE  | 0.018543 |
| ErmC                                                             | -2.03  | Prior HE  | 4.29E-04 |
| ANT_6_la                                                         | -1.92  | Prior HE  | 9.72E-05 |
| PDC_3                                                            | -1.87  | Prior HE  | 0.004275 |
| aadS                                                             | -1.84  | Prior HE  | 0.008296 |
| arIS                                                             | -1.77  | Prior HE  | 0.001127 |
| SHV_126                                                          | -1.65  | Prior HE  | 0.014703 |
| Bifidobacteria_intrinsic_ileS_conferring_resistance_to_mupirocin | -1.63  | Prior HE  | 0.017417 |
| mexJ                                                             | -1.61  | Prior HE  | 0.034514 |
| TriC                                                             | -1.56  | Prior HE  | 0.01828  |
| Tet_X3                                                           | -1.55  | Prior HE  | 0.023154 |
| Tet_X4                                                           | -1.53  | Prior HE  | 0.024412 |
| MuxC                                                             | -1.49  | Prior HE  | 0.003973 |
| Klebsiella_pneumoniae_KpnE                                       | -1.35  | Prior HE  | 0.004959 |
| macB                                                             | -1.31  | Prior HE  | 0.01627  |
| cdeA                                                             | -1.29  | Prior HE  | 0.014446 |
| tlrC                                                             | -1.28  | Prior HE  | 0.038061 |
| Campylobacter_coli_chloramphenicol_acetyltransferase             | 1      | No HE     | 0.030701 |
| Pseudomonas_aeruginosa_CpxR                                      | 1.07   | No HE     | 0.001614 |
| aadA22                                                           | 1.09   | No HE     | 0.00101  |
| APH_6_lc                                                         | 1.19   | No HE     | 0.003567 |
| AAC_3_IV                                                         | 1.22   | No HE     | 4.36E-04 |
| QnrB8                                                            | 1.24   | No HE     | 0.013442 |
| dfrA14                                                           | 1.33   | No HE     | 0.005042 |
| aadA8                                                            | 2.37   | No HE     | 0.018973 |

**Table S8: DESeq2 Comparison of AMR genes No HE vs Prior HE**

| Lineage                                                 | LOG2FC | Direction | pvalue   |
|---------------------------------------------------------|--------|-----------|----------|
| vanZ                                                    | -3.3   | Prior HE  | 0.005011 |
| RbpA_bacterial_RNA_polymerase_binding_protein           | -2.71  | Prior HE  | 0.019651 |
| KPC_beta_lactamase                                      | -2.44  | Prior HE  | 0.023482 |
| PDC_beta_lactamase                                      | -2.31  | Prior HE  | 8.45E-05 |
| antibiotic_resistant_ileucyl_tRNA_synthetase_ileS       | -1.54  | Prior HE  | 0.031918 |
| multidrug_and_toxic_compound_extrusion_MATE_transporter | -1.08  | Prior HE  | 0.01371  |
| quinolone_resistance_protein_qnr                        | 1.66   | No HE     | 1.18E-06 |

**Table S9: DESeq2 Comparison of Resistomes No HE vs Prior HE**

| Lineage                          | LOG2FC | Direction | pvalue   |
|----------------------------------|--------|-----------|----------|
| <i>Listeria_monocytogenes</i>    | -4.52  | Prior HE  | 0.013184 |
| <i>Staphylococcus_aureus</i>     | -2.15  | Prior HE  | 1.76E-04 |
| <i>Transposon_Tn4551</i>         | -1.54  | Prior HE  | 0.033926 |
| <i>Bifidobacterium_bifidum</i>   | -1.53  | Prior HE  | 0.036106 |
| <i>Streptomyces_rishiriensis</i> | -1.25  | Prior HE  | 0.039764 |
| <i>Streptococcus_oralis</i>      | -1.23  | Prior HE  | 3.67E-05 |
| <i>Pseudomonas_fluorescens</i>   | -1.23  | Prior HE  | 0.026737 |

**Table S10: DESeq2 Comparison of bacterial species between patients with/without hospitalizations**

| Lineage                                    | LOG2FC | Direction | P-value  |
|--------------------------------------------|--------|-----------|----------|
| <i>Lactobacillus_johnsonii</i>             | -4.82  | Yes       | 0.025568 |
| <i>Lactobacillus_taiwanensis</i>           | -3.05  | Yes       | 0.022549 |
| <i>Lactobacillus_reuteri</i>               | -2.24  | Yes       | 0.008086 |
| <i>Veillonella_rodentium</i>               | -2.1   | Yes       | 0.026939 |
| <i>Veillonella_sp_6_1_27</i>               | -1.95  | Yes       | 0.030128 |
| <i>Dialister_pneumosintes</i>              | -1.41  | Yes       | 0.004617 |
| <i>Megasphaera_elsdenii</i>                | 5.64   | No        | 0.004679 |
| <i>Bifidobacterium_angulatum</i>           | 4.92   | No        | 0.019657 |
| <i>Intestinibacillus_massiliensis</i>      | 4.88   | No        | 0.002948 |
| <i>bacterium_LF_3</i>                      | 4.84   | No        | 0.006838 |
| <i>Clostridium_disporicum</i>              | 4.8    | No        | 0.030494 |
| <i>Holdemania_sp_Marseille_P2844</i>       | 4.5    | No        | 0.006876 |
| <i>Bifidobacterium_adolescentis</i>        | 4.4    | No        | 0.003838 |
| <i>Negativibacillus_massiliensis</i>       | 4.01   | No        | 0.036816 |
| <i>Gordonibacter_pamelaeae</i>             | 3.88   | No        | 0.001004 |
| <i>Stomatobaculum_longum</i>               | 3.81   | No        | 0.006674 |
| <i>Gemmiger_formicilis</i>                 | 3.3    | No        | 0.00467  |
| <i>Eggerthella_sp_YY7918</i>               | 3.12   | No        | 0.019952 |
| <i>Clostridium_leptum</i>                  | 3      | No        | 0.020136 |
| <i>Ileibacterium_massiliense</i>           | 2.95   | No        | 0.005354 |
| <i>Ruminococcus_bromii</i>                 | 2.95   | No        | 0.032055 |
| <i>Fusobacterium_nucleatum</i>             | 2.86   | No        | 0.006738 |
| <i>Sharpea_azabuensis</i>                  | 2.79   | No        | 0.016735 |
| <i>Clostridium_sp_Marseille_P3244</i>      | 2.67   | No        | 0.008697 |
| <i>Erysipelotrichaceae_bacterium_21_3</i>  | 2.61   | No        | 0.016633 |
| <i>Coprobacillus_sp_8_1_38FAA</i>          | 2.59   | No        | 9.74E-04 |
| <i>Eubacterium_sp_YI</i>                   | 2.54   | No        | 0.003218 |
| <i>Massilioclostridium_coli</i>            | 2.54   | No        | 0.003429 |
| <i>Lachnospiraceae_bacterium_1_1_57FAA</i> | 2.54   | No        | 0.020971 |
| <i>Dorea_longicatena</i>                   | 2.35   | No        | 0.005021 |
| <i>Barnesiella_intestinihominis</i>        | 2.31   | No        | 0.021871 |
| <i>Bittarella_massiliensis</i>             | 2.19   | No        | 0.004025 |
| <i>Lachnospira_pectinoschiza</i>           | 2.18   | No        | 0.014039 |
| <i>Angelakisella_massiliensis</i>          | 2.17   | No        | 0.029552 |
| <i>Gordonibacter_massiliensis</i>          | 2.04   | No        | 0.025837 |
| <i>Enterococcus_faecium</i>                | 1.77   | No        | 0.030714 |
| <i>Lactobacillus_antri</i>                 | 1.73   | No        | 0.040165 |
| <i>Streptococcus_sp_NLAE_zl_C503</i>       | 1.72   | No        | 0.004432 |
| <i>Bilophila_wadsworthia</i>               | 1.7    | No        | 0.035182 |
| <i>Streptococcus_sp_oral_taxon_058</i>     | 1.54   | No        | 9.46E-05 |
| <i>Streptococcus_oralis</i>                | 1.43   | No        | 0.04173  |
| <i>Streptococcus_sp_HMSC076C09</i>         | 1.12   | No        | 0.048357 |
| <i>Streptococcus_sp_HMSC077D04</i>         | 1.04   | No        | 0.034966 |

**Table S11: MAASlin2 Comparison of bacterial species between those patients who were hospitalized within 90 days compared to those who were not**

| <b>Bacterial species</b>                | <b>Coefficient</b> | <b>Std Error</b> | <b>p-value</b> | <b>q-value</b> |
|-----------------------------------------|--------------------|------------------|----------------|----------------|
| <i>Clostridium_aerotolerans</i>         | 7.592922           | 0.69483          | 3.81E-21       | 4.49E-18       |
| <i>Clostridium_sphenoides</i>           | 7.874307           | 0.847236         | 1.01E-16       | 5.96E-14       |
| <i>Ruminococcaceae_bacterium_CPB6</i>   | 7.228162           | 0.840646         | 6.79E-15       | 2.67E-12       |
| <i>Campylobacter_helveticus</i>         | 7.687291           | 0.908964         | 1.57E-14       | 4.63E-12       |
| <i>Desulfotomaculum_guttoideum</i>      | 7.416556           | 0.90159          | 6.16E-14       | 1.45E-11       |
| <i>Pseudomonas_lundensis</i>            | 6.755691           | 0.871955         | 9.90E-13       | 1.94E-10       |
| <i>Corynebacterium_argentoratense</i>   | 5.402029           | 0.771889         | 6.61E-11       | 1.11E-08       |
| <i>Clostridium_sp._Marseille_P2415</i>  | 5.287963           | 0.765265         | 1.07E-10       | 1.58E-08       |
| <i>Enterobacter_sp._BIDMC_29</i>        | 6.503206           | 0.974658         | 3.85E-10       | 5.04E-08       |
| <b>MELD score</b>                       | 0.408795           | 0.063203         | 1.14E-09       | 1.34E-07       |
| <i>Ethanoligenens_harbinense</i>        | 5.716702           | 0.909251         | 2.91E-09       | 3.12E-07       |
| <i>Lactobacillus_timonensis</i>         | 4.293639           | 0.691846         | 4.43E-09       | 4.34E-07       |
| <i>Megasphaera_massiliensis</i>         | -4.14289           | 0.676906         | 6.86E-09       | 6.21E-07       |
| <i>Lactobacillus_animalis</i>           | 5.604159           | 0.941611         | 1.61E-08       | 1.35E-06       |
| <i>bacterium_LF_3</i>                   | -3.22386           | 0.545662         | 2.00E-08       | 1.57E-06       |
| <i>Pectobacterium_polaris</i>           | 6.154924           | 1.081076         | 5.76E-08       | 4.24E-06       |
| <i>Desulfovibrio_sp._6_1_46AFAA</i>     | 5.710722           | 1.00972          | 6.92E-08       | 4.79E-06       |
| <i>Bacteroides_eggerthii</i>            | 2.348308           | 0.442954         | 3.74E-07       | 2.32E-05       |
| <i>Desulfovibrio_fairfieldensis</i>     | 5.732978           | 1.079928         | 3.61E-07       | 2.32E-05       |
| <i>Bacteroides_paurosaccharolyticus</i> | 3.779167           | 0.728369         | 6.30E-07       | 3.71E-05       |
| <i>Atopobium_minutum</i>                | 6.261503           | 1.214486         | 7.33E-07       | 4.11E-05       |
| <i>Lactobacillus_johnsonii</i>          | 4.090141           | 0.807571         | 1.11E-06       | 5.94E-05       |
| <i>Actinomyces_radicidentis</i>         | 4.491694           | 0.92451          | 2.79E-06       | 0.000143       |
| <i>Cloacibacillus_porcorum</i>          | -6.06685           | 1.261112         | 3.43E-06       | 0.000169       |
| <i>Enterobacter_sp._IF2SW_B1</i>        | 4.573978           | 0.962688         | 4.45E-06       | 0.00021        |
| <i>Bifidobacterium_thermophilum</i>     | -2.99791           | 0.64201          | 6.33E-06       | 0.000287       |
| <i>Proteus_columbae</i>                 | 5.108279           | 1.098859         | 6.92E-06       | 0.000302       |
| <i>Dysgonomonas_gadei</i>               | 5.12005            | 1.14555          | 1.47E-05       | 0.000619       |
| <i>Bifidobacterium_adolescentis</i>     | -2.19538           | 0.511809         | 3.08E-05       | 0.001251       |
| <i>Scardovia_wiggisiae</i>              | 1.997282           | 0.473705         | 4.13E-05       | 0.001622       |
| <i>Raoultibacter_timonensis</i>         | -5.46954           | 1.33649          | 6.73E-05       | 0.002559       |
| <i>Candidatus_Stoquefichus_sp._SB1</i>  | -3.71245           | 0.909349         | 7.00E-05       | 0.002577       |
| <i>Christensenella_timonensis</i>       | -3.72828           | 0.916579         | 7.42E-05       | 0.002648       |
| <i>Duodenibacillus_massiliensis</i>     | -4.87447           | 1.230323         | 0.000111       | 0.003861       |
| <i>Yersinia_nurmii</i>                  | 2.769388           | 0.703742         | 0.000123       | 0.004153       |
| <i>Massilioclostridium_coli</i>         | -1.23365           | 0.317172         | 0.000147       | 0.004799       |
| <i>Parabacteroides_johnsonii</i>        | 1.800856           | 0.464988         | 0.000156       | 0.00497        |
| <i>Lactobacillus_sp._HMSC068F07</i>     | 3.290518           | 0.853568         | 0.000167       | 0.005175       |
| <i>Campylobacter_gracilis</i>           | 1.435931           | 0.373565         | 0.000174       | 0.005257       |

|                                                |          |          |          |          |
|------------------------------------------------|----------|----------|----------|----------|
| <i>Lactobacillus_harbinensis</i>               | -8.01303 | 2.093762 | 0.000185 | 0.005455 |
| <i>Blautia_producta</i>                        | 2.888703 | 0.756252 | 0.00019  | 0.00547  |
| <b>Hepatic Encephalopathy</b>                  | 0.535402 | 0.140563 | 0.000198 | 0.005557 |
| <i>Selenomonas_bovis</i>                       | -7.67085 | 2.043571 | 0.000243 | 0.006657 |
| <i>Collinsella_stercoris</i>                   | 2.444294 | 0.657371 | 0.000277 | 0.007403 |
| <i>Bifidobacterium_animalis</i>                | -4.96262 | 1.343721 | 0.000303 | 0.007894 |
| <i>Streptococcus_sobrinus</i>                  | 2.376968 | 0.644452 | 0.000308 | 0.007894 |
| <i>Clostridium_disporicum</i>                  | 3.625167 | 0.995139 | 0.000363 | 0.009103 |
| <i>Erysipelotrichaceae_bacterium_5_2_54FAA</i> | 2.271604 | 0.625182 | 0.000376 | 0.009218 |
| <i>Porphyromonas_sp._KLE_1280</i>              | -8.77541 | 2.451715 | 0.000456 | 0.010953 |
| <b>Lactulose use</b>                           | 0.559616 | 0.1567   | 0.000469 | 0.011043 |
| <i>Ruminococcus_champanellensis</i>            | -1.54246 | 0.435404 | 0.000519 | 0.011979 |
| <i>Citrobacter_sp._KTE30</i>                   | 3.054304 | 0.868945 | 0.000571 | 0.012943 |
| <i>Lactobacillus_sp._HMSC17G08</i>             | -4.9796  | 1.420702 | 0.000591 | 0.013147 |
| <i>Proteus_sp._HMSC10D02</i>                   | 3.729865 | 1.066438 | 0.000607 | 0.013246 |
| <i>Clostridium_saccharogumia</i>               | -1.89447 | 0.542932 | 0.000625 | 0.013381 |
| <i>Provencibacterium_massiliense</i>           | -1.26232 | 0.363108 | 0.000653 | 0.013743 |
| <i>Angelakisella_massiliensis</i>              | -0.79168 | 0.229573 | 0.00072  | 0.014615 |
| <i>Collinsella_bouchesdurhonensis</i>          | -2.62445 | 0.760592 | 0.000715 | 0.014615 |
| <i>Lactobacillus_futsaii</i>                   | 2.877955 | 0.844736 | 0.00083  | 0.016569 |
| <i>Mycoplasma_salivarium</i>                   | -15.5189 | 4.567722 | 0.000857 | 0.016824 |
| <i>Klebsiella_michiganensis</i>                | 2.735671 | 0.809119 | 0.000906 | 0.017407 |
| <i>Oxalobacter_formigenes</i>                  | -3.93273 | 1.164266 | 0.000916 | 0.017407 |
| <i>Clostridium_bolteae</i>                     | 1.650174 | 0.489302 | 0.000933 | 0.017445 |
| <i>Clostridium_sporosphaeroides</i>            | 2.277428 | 0.681949 | 0.001043 | 0.018896 |
| <i>Neisseria_bacilliformis</i>                 | 2.709928 | 0.811015 | 0.001036 | 0.018896 |
| <i>Ileibacterium_massiliense</i>               | -1.11513 | 0.335045 | 0.001083 | 0.019329 |
| <i>Lactobacillus_taiwanensis</i>               | 2.723624 | 0.821353 | 0.001128 | 0.019841 |
| <i>Actinomyces_bouchesdurhonensis</i>          | -2.70429 | 0.819411 | 0.001189 | 0.020604 |
| <i>Cloacibacillus_evryensis</i>                | -4.31111 | 1.312972 | 0.001258 | 0.021168 |
| <i>Ruminococcus_bicirculans</i>                | -1.56326 | 0.475868 | 0.001251 | 0.021168 |
| <i>Holdemania_sp._Marseille_P2844</i>          | -2.63234 | 0.808462 | 0.001378 | 0.022859 |
| <i>Anaerotruncus_rubiinfantis</i>              | -1.31537 | 0.404821 | 0.001409 | 0.023047 |
| <i>Prevotella_saccharolytica</i>               | -4.80998 | 1.497158 | 0.001588 | 0.025627 |
| <i>Ruminococcus_flavefaciens</i>               | -2.24962 | 0.706631 | 0.001746 | 0.027801 |
| <i>Bifidobacterium_angulatum</i>               | -2.66402 | 0.845295 | 0.001937 | 0.030422 |
| <i>Clostridium_butyricum</i>                   | 1.792873 | 0.571922 | 0.002044 | 0.031685 |
| <i>Synergistes_sp._3_1_syn1</i>                | -4.12855 | 1.323008 | 0.00214  | 0.032734 |
| <i>Lactobacillus_agilis</i>                    | 2.674522 | 0.865816 | 0.002366 | 0.035282 |
| <i>Lelliottia_nimipressuralis</i>              | 3.049747 | 0.98722  | 0.002365 | 0.035282 |
| <i>Anaerosporebacter_mobilis</i>               | -2.15087 | 0.697961 | 0.002422 | 0.035666 |
| <i>Alistipes_indistinctus</i>                  | -2.25561 | 0.735589 | 0.002542 | 0.036966 |
| <i>Eubacterium_sp._YI</i>                      | -1.06046 | 0.346712 | 0.002605 | 0.037421 |
| <i>Veillonella_seminalis</i>                   | -6.39904 | 2.095705 | 0.002648 | 0.037584 |
| <i>Prevotella_sp._oral_taxon_299</i>           | -4.74509 | 1.572264 | 0.002959 | 0.041495 |
| <i>Bacteroides_helcogenes</i>                  | 1.029002 | 0.344354 | 0.003246 | 0.044319 |

|                                            |          |          |          |          |
|--------------------------------------------|----------|----------|----------|----------|
| <i>Enterococcus_sp._6D12_DIV0197</i>       | 3.062361 | 1.025735 | 0.003273 | 0.044319 |
| <i>Neisseria_sp._GT4A_CT1</i>              | -7.97085 | 2.666363 | 0.003234 | 0.044319 |
| <i>Lachnospiraceae_bacterium_1_1_57FAA</i> | -1.26778 | 0.425598 | 0.003342 | 0.044735 |
| <i>Gordonibacter_pamelaeae</i>             | -1.79977 | 0.609281 | 0.003608 | 0.047757 |
| <i>Gardnerella_sp._30_4</i>                | 3.11223  | 1.057321 | 0.003725 | 0.04876  |

**Table S12: Hospitalizations according to ARG patterns using MaAsLin2**

| <b>AMR Gene family</b>                                    | <b>Coefficient</b> | <b>Std Error</b> | <b>p-value</b> | <b>q-value</b> |
|-----------------------------------------------------------|--------------------|------------------|----------------|----------------|
| MELD score                                                | 0.416846           | 0.065426         | 2.01E-09       | 2.11E-07       |
| <i>ANT (2)</i>                                            | 3.944935           | 0.969324         | 7.46E-05       | 0.004          |
| Hepatic Encephalopathy                                    | 0.553297           | 0.146857         | 0.0002         | 0.008          |
| On lactulose                                              | 0.578707           | 0.164193         | 0.0006         | 0.015          |
| Llm_23S_ribosomal_RNA_methyltransferase                   | -1.37914           | 0.446251         | 0.0024         | 0.048          |
| Aminocoumarin resistant parY                              | -0.65035           | 0.232716         | 0.006          | 0.049          |
| Rifamycin resistant beta-subunit of RNA polymerase (rpoB) | -0.56267           | 0.23582          | 0.01           | 0.050          |
| <b>ARO term</b>                                           | <b>Coefficient</b> | <b>Std Error</b> | <b>p-value</b> | <b>q-value</b> |
| MELD score                                                | 0.416846           | 0.065426         | 2.01E-09       | 2.39E-06       |
| <i>dfrA12</i>                                             | 5.20263            | 1.178382         | 1.88E-05       | 0.011          |
| <i>ANT(2)_la</i>                                          | 3.944935           | 0.969324         | 7.46E-05       | 0.017          |
| <i>InuA</i>                                               | 3.741122           | 0.89308          | 4.67E-05       | 0.017          |
| <i>MexE</i>                                               | 5.585521           | 1.359197         | 6.39E-05       | 0.017          |
| Hepatic Encephalopathy                                    | 0.553297           | 0.146857         | 0.000233       | 0.046          |
| <i>OXY_1_6</i>                                            | 5.006226           | 1.363162         | 0.00033        | 0.049          |
| <i>vanVB</i>                                              | 3.681022           | 0.994075         | 0.000295       | 0.049          |
| <i>OXY_1_4</i>                                            | 4.689606           | 1.292108         | 0.000385       | 0.050          |
| <b>Resistomes</b>                                         | <b>Coefficient</b> | <b>Std Error</b> | <b>p-value</b> | <b>q-value</b> |
| MELD score                                                | 0.416846           | 0.065426         | 2.01E-09       | 3.49E-07       |
| Hepatic Encephalopathy                                    | 0.553297           | 0.146857         | 0.000233       | 0.020          |
| On lactulose                                              | 0.578707           | 0.164193         | 0.000557       | 0.032          |
| Gram negative bacterium                                   | 4.221368           | 1.360246         | 0.002272       | 0.046          |
| <i>Nocardia farcinica</i>                                 | -0.6116            | 0.206644         | 0.00356        | 0.049          |
| <i>Streptomyces niveus</i>                                | -1.50058           | 0.518148         | 0.004322       | 0.049          |
| <i>Citrobacter freundii</i>                               | 1.032339           | 0.359189         | 0.004618       | 0.050          |
| <i>Streptomyces rishiriensis</i>                          | -0.65035           | 0.232716         | 0.005849       | 0.046          |

**Table S13: DESeq2 Comparison of bacterial species between patients with/without death**

| Lineage                                | LOG2FC | Direction       | pvalue   |
|----------------------------------------|--------|-----------------|----------|
| <i>Pseudomonas_lundensis</i>           | -6.44  | Death_1Year_Yes | 0.002397 |
| <i>Clostridium_sphenoides</i>          | -5.93  | Death_1Year_Yes | 0.002397 |
| <i>Campylobacter_helveticus</i>        | -4.32  | Death_1Year_Yes | 0.002397 |
| <i>Desulfotomaculum_guttoideum</i>     | -2.58  | Death_1Year_Yes | 0.002397 |
| <i>Lactobacillus_fruventi</i>          | -2.32  | Death_1Year_Yes | 1.19E-07 |
| <i>Asaccharospora_irregularis</i>      | -2.32  | Death_1Year_Yes | 1.57E-05 |
| <i>Aerococcus_sp_HMSC23C02</i>         | -2.32  | Death_1Year_Yes | 0.002397 |
| <i>Neisseria_bacilliformis</i>         | -1.58  | Death_1Year_Yes | 1.57E-05 |
| <i>Colwellia_echini</i>                | -1.58  | Death_1Year_Yes | 0.002397 |
| <i>Lactobacillus_gallinarum</i>        | -1.58  | Death_1Year_Yes | 0.002397 |
| <i>Lactobacillus_parabuchneri</i>      | -1.58  | Death_1Year_Yes | 0.002397 |
| <i>Aerococcus_christensenii</i>        | -1     | Death_1Year_Yes | 0.002397 |
| <i>Bacillus_paralicheniformis</i>      | -1     | Death_1Year_Yes | 0.002397 |
| <i>Butyricimonas_synergistica</i>      | -1     | Death_1Year_Yes | 0.002397 |
| <i>Chryseobacterium_bovis</i>          | -1     | Death_1Year_Yes | 0.002397 |
| <i>Lachnospira_multipara</i>           | -1     | Death_1Year_Yes | 0.002397 |
| <i>Lactobacillus_coleohominis</i>      | -1     | Death_1Year_Yes | 0.002397 |
| <i>Lactobacillus_sp_HMSC078F07</i>     | -1     | Death_1Year_Yes | 0.002397 |
| <i>Neisseria_gonorrhoeae</i>           | -1     | Death_1Year_Yes | 0.002397 |
| <i>Propionibacterium_sp_HMSC067A02</i> | -1     | Death_1Year_Yes | 0.002397 |
| <i>Lactobacillus_sp_HMSC066G01</i>     | 1      | Death_1Year_No  | 9.14E-04 |
| <i>Enterococcus_avium</i>              | 1      | Death_1Year_No  | 0.049566 |
| <i>Oscillibacter_sp_KLE_1745</i>       | 1.22   | Death_1Year_No  | 0.008788 |
| <i>Bacteroides_helcogenes</i>          | 1.46   | Death_1Year_No  | 0.043766 |
| <i>Bacteroides_sp_2_1_16</i>           | 1.49   | Death_1Year_No  | 0.004573 |
| <i>Lactobacillus_fermentum</i>         | 1.59   | Death_1Year_No  | 0.019971 |
| <i>Veillonella_sp_HPA0037</i>          | 1.66   | Death_1Year_No  | 0.029392 |
| <i>Bacteroides_caecimuris</i>          | 1.67   | Death_1Year_No  | 0.013637 |
| <i>Ileibacterium_massiliense</i>       | 1.68   | Death_1Year_No  | 0.022419 |
| <i>Acetivibrio_ethanolgignens</i>      | 1.68   | Death_1Year_No  | 0.035462 |
| <i>Streptococcus_sp_HMSC057G03</i>     | 1.73   | Death_1Year_No  | 0.007257 |
| <i>Lactobacillus_gastricus</i>         | 1.77   | Death_1Year_No  | 0.007156 |
| <i>Actinomyces_oris</i>                | 1.77   | Death_1Year_No  | 0.034493 |
| <i>Lactobacillus_plantarum</i>         | 1.81   | Death_1Year_No  | 8.58E-04 |
| <i>Bacteroides_sp_1_1_30</i>           | 1.91   | Death_1Year_No  | 0.023112 |
| <i>Parabacteroides_sp_2_1_7</i>        | 1.92   | Death_1Year_No  | 0.037014 |
| <i>Lactobacillus_antri</i>             | 1.94   | Death_1Year_No  | 0.004144 |

|                                                |      |                |          |
|------------------------------------------------|------|----------------|----------|
| <i>Veillonella_atypica</i>                     | 2    | Death_1Year_No | 0.038635 |
| <i>Streptococcus_anginosus</i>                 | 2.04 | Death_1Year_No | 0.025737 |
| <i>Streptococcus_sp_HMSC061E03</i>             | 2.07 | Death_1Year_No | 0.043553 |
| <i>Lactobacillus_sp_UMNPBX3</i>                | 2.12 | Death_1Year_No | 0.023456 |
| <i>Parabacteroides_distasonis</i>              | 2.18 | Death_1Year_No | 0.019821 |
| <i>Streptococcus_vestibularis</i>              | 2.21 | Death_1Year_No | 0.026362 |
| <i>Enterococcus_faecium</i>                    | 2.27 | Death_1Year_No | 8.74E-04 |
| <i>Bacteroides_uniformis</i>                   | 2.27 | Death_1Year_No | 0.04533  |
| <i>Lachnospiraceae_bacterium_5_1_57FAA</i>     | 2.3  | Death_1Year_No | 0.038733 |
| <i>Streptococcus_sp_HMSC078H03</i>             | 2.45 | Death_1Year_No | 0.045263 |
| <i>Lachnospiraceae_bacterium_3_1_57FAA_CT1</i> | 2.46 | Death_1Year_No | 0.022816 |
| <i>Sellimonas_intestinalis</i>                 | 2.5  | Death_1Year_No | 0.001221 |
| <i>Lactobacillus_vaginalis</i>                 | 2.53 | Death_1Year_No | 0.042067 |
| <i>Lactobacillus_johnsonii</i>                 | 3.61 | Death_1Year_No | 0.027163 |
| <i>Anaerostipes_hadrus</i>                     | 5.41 | Death_1Year_No | 0.043505 |
| <i>Bifidobacterium_adolescentis</i>            | 5.58 | Death_1Year_No | 0.010899 |
| <i>Lachnospira_pectinoschiza</i>               | 5.82 | Death_1Year_No | 0.018895 |
| <i>Bacteroides_bouchesdurhonensis</i>          | 5.83 | Death_1Year_No | 0.037008 |
| <i>Absiella_dolichum</i>                       | 5.97 | Death_1Year_No | 0.027067 |
| <i>Neglecta_timonensis</i>                     | 6.88 | Death_1Year_No | 0.043507 |

**Table S14: MaAsLin2 Comparison of bacterial species between those patients who died within 1 year compared to those who were not**

| <b>Bacterial species</b>                   | <b>Coefficient</b> | <b>Std Error</b> | <b>p-value</b> | <b>q-value</b> |
|--------------------------------------------|--------------------|------------------|----------------|----------------|
| <i>Clostridium_sphenoides</i>              | 8.290692           | 0.604374         | 7.31E-29       | 8.61E-26       |
| <i>Campylobacter_helveticus</i>            | 8.156014           | 0.600078         | 1.63E-28       | 9.61E-26       |
| <i>Pseudomonas_lundensis</i>               | 7.664528           | 0.694685         | 1.96E-21       | 7.68E-19       |
| <i>Pseudomonas_stutzeri</i>                | 6.547608           | 0.802033         | 8.88E-14       | 2.61E-11       |
| <i>Pectobacterium_polaris</i>              | 7.317731           | 1.011614         | 1.81E-11       | 4.25E-09       |
| <i>Bacillus_paralicheniformis</i>          | 4.926454           | 0.724337         | 1.93E-10       | 3.38E-08       |
| <i>Desulfotomaculum_guttoideum</i>         | 7.115187           | 1.047297         | 2.01E-10       | 3.38E-08       |
| <i>Lactobacillus_rossiae</i>               | 4.758192           | 0.742356         | 1.54E-09       | 2.27E-07       |
| <i>Neisseria_gonorrhoeae</i>               | 4.508563           | 0.713589         | 2.48E-09       | 3.25E-07       |
| <i>Colwellia_echini</i>                    | 4.665834           | 0.749125         | 3.95E-09       | 4.65E-07       |
| <i>Alcanivorax_hongdengensis</i>           | 4.836703           | 0.78729          | 6.09E-09       | 6.53E-07       |
| <i>Leptospira_sp._JW3_C_A1</i>             | 4.77791            | 0.789937         | 9.87E-09       | 9.69E-07       |
| <i>Aerococcus_sp._HMSC23C02</i>            | 4.898015           | 0.8239           | 1.66E-08       | 1.50E-06       |
| <i>Paeniglutamicibacter_antarcticus</i>    | 4.723313           | 0.800015         | 2.04E-08       | 1.50E-06       |
| <i>Prevotella_copri</i>                    | -5.84785           | 0.98715          | 1.85E-08       | 1.50E-06       |
| <i>Propionibacterium_sp._HMSC067A02</i>    | 4.880055           | 0.826335         | 2.02E-08       | 1.50E-06       |
| <i>Pseudomonas_sp._Ep_R1</i>               | 5.450812           | 0.951841         | 4.90E-08       | 3.39E-06       |
| <b>MELD score</b>                          | 0.481243           | 0.10545          | 9.92E-06       | 0.000649       |
| <i>Alistipes_indistinctus</i>              | -5.70684           | 1.255507         | 1.07E-05       | 0.000664       |
| <i>Gabonia_massiliensis</i>                | 2.973682           | 0.674186         | 1.88E-05       | 0.001106       |
| <i>Clostridium_butyricum</i>               | 2.589304           | 0.605233         | 3.22E-05       | 0.001725       |
| <i>Klebsiella_michiganensis</i>            | 3.741447           | 0.872796         | 3.11E-05       | 0.001725       |
| <i>Barnesiella_intestinihominis</i>        | -4.22453           | 1.009611         | 4.69E-05       | 0.002402       |
| <i>Alistipes_ihumii</i>                    | -3.49826           | 0.843706         | 5.45E-05       | 0.002676       |
| <i>Bacteroides_eggerthii</i>               | 3.135202           | 0.778519         | 8.68E-05       | 0.004089       |
| <i>Proteus_sp._HMSC10D02</i>               | 4.950639           | 1.266186         | 0.000136       | 0.006153       |
| <i>Tidjanibacter_massiliensis</i>          | -2.72215           | 0.699378         | 0.000145       | 0.006333       |
| <i>Gordonibacter_uroolithinifaciens</i>    | -2.90821           | 0.77325          | 0.000237       | 0.00995        |
| <i>Clostridium_disporicum</i>              | 4.510528           | 1.20907          | 0.000264       | 0.01074        |
| <i>Neisseria_bacilliformis</i>             | 3.48207            | 0.937241         | 0.00028        | 0.010979       |
| <i>Dielma_fastidiosa</i>                   | -4.63552           | 1.251799         | 0.000292       | 0.011105       |
| <i>Serratia_sp._Leaf51</i>                 | 4.748093           | 1.292285         | 0.000324       | 0.011945       |
| <i>Massilioclostridium_coli</i>            | -1.80045           | 0.501644         | 0.00044        | 0.015708       |
| <i>Neglecta_timonensis</i>                 | -2.58713           | 0.726337         | 0.000485       | 0.016787       |
| <i>Asaccharospora_irregularis</i>          | 2.733496           | 0.775377         | 0.000551       | 0.018541       |
| <i>Alistipes_putredinis</i>                | -2.08029           | 0.597276         | 0.000639       | 0.020899       |
| <i>bacterium_LF_3</i>                      | -3.15239           | 0.909875         | 0.000681       | 0.021667       |
| <b>Hepatic Encephalopathy</b>              | 0.640503           | 0.186403         | 0.000751       | 0.023276       |
| <i>Lachnospiraceae_bacterium_5_1_63FAA</i> | -1.66308           | 0.486888         | 0.000805       | 0.024321       |
| <i>Eubacterium_hallii</i>                  | 1.759866           | 0.517625         | 0.00085        | 0.024423       |
| <i>Lactobacillus_ghanensis</i>             | 3.033717           | 0.892015         | 0.000847       | 0.024423       |
| <i>Paraprevotella_clara</i>                | -2.08575           | 0.619777         | 0.000956       | 0.026811       |

|                                        |          |          |          |          |
|----------------------------------------|----------|----------|----------|----------|
| <i>Acidaminococcus_intestini</i>       | -2.36197 | 0.735324 | 0.001591 | 0.043591 |
| <i>Eubacterium_sulci</i>               | -4.67244 | 1.45954  | 0.001649 | 0.044135 |
| <i>Fusicatenibacter_saccharivorans</i> | -1.33235 | 0.422874 | 0.001942 | 0.049924 |
| <i>Veillonella_sp._3_1_44</i>          | 2.487249 | 0.78971  | 0.001949 | 0.049924 |

**Table S15: Death according to ARG patterns using MaAsLin2**

| <b>AMR Gene family</b>              | <b>Coefficient</b> | <b>Std Error</b> | <b>p-value</b> | <b>q-value</b> |
|-------------------------------------|--------------------|------------------|----------------|----------------|
| <i>ANT(2)</i>                       | 4.933638           | 0.800366         | 5.80E-09       | 6.09E-07       |
| MELD score                          | 0.488417           | 0.107213         | 1.05E-05       | 0.00055        |
| Hepatic Encephalopathy              | 0.672385           | 0.190429         | 0.000545       | 0.019066       |
| <b>ARO term</b>                     | <b>Coefficient</b> | <b>Std Error</b> | <b>p-value</b> | <b>q-value</b> |
| <i>TriB</i>                         | 17.01624           | 1.941014         | 2.96E-15       | 3.52E-12       |
| <i>MexE</i>                         | 6.344279           | 1.015945         | 3.85E-09       | 2.29E-06       |
| <i>ANT(2__)_la</i>                  | 4.933638           | 0.800366         | 5.80E-09       | 2.30E-06       |
| <i>dfrA12</i>                       | 6.441504           | 1.057267         | 8.34E-09       | 2.48E-06       |
| <i>tetS</i>                         | 2.921262           | 0.539251         | 2.25E-07       | 5.36E-05       |
| MELD score                          | 0.488417           | 0.107213         | 1.05E-05       | 0.002078       |
| <i>AAC(6)_la</i>                    | 4.934291           | 1.107515         | 1.59E-05       | 0.002705       |
| <i>tet(B)</i>                       | 2.372869           | 0.540336         | 2.07E-05       | 0.003077       |
| <i>LnuP</i>                         | 3.637684           | 0.871269         | 4.94E-05       | 0.006526       |
| <i>CfxA6</i>                        | -3.15404           | 0.851239         | 0.000293       | 0.034839       |
| <i>TEM_48</i>                       | 4.566194           | 1.254481         | 0.00037        | 0.040072       |
| <i>mexM</i>                         | 3.594843           | 1.00494          | 0.000463       | 0.045909       |
| Hepatic Encephalopathy              | 0.672385           | 0.190429         | 0.000545       | 0.048503       |
| <i>TEM_219</i>                      | 1.777728           | 0.505381         | 0.000571       | 0.048503       |
| <b>Resistomes</b>                   | <b>Coefficient</b> | <b>Std Error</b> | <b>p-value</b> | <b>q-value</b> |
| MELD score                          | 0.488417           | 0.107213         | 1.05E-05       | 0.001823       |
| <i>Legionella pneumophila</i>       | 2.136465           | 0.583204         | 0.000341       | 0.019754       |
| uncultured_organism                 | -3.15404           | 0.851239         | 0.000293       | 0.019754       |
| Hepatic Encephalopathy              | 0.672385           | 0.190429         | 0.000545       | 0.023696       |
| Gram negative bacterium             | 3.911547           | 1.152632         | 0.000875       | 0.030437       |
| <i>Desulfitobacterium hafniense</i> | -3.222             | 0.996429         | 0.001492       | 0.043275       |
| On Lactulose                        | 0.630089           | 0.216487         | 0.004137       | 0.088609       |
| <i>Acidaminococcus fermentans</i>   | -4.77778           | 1.66093          | 0.004583       | 0.088609       |
| <i>Enterobacter hormaechei</i>      | 2.013171           | 0.680997         | 0.003598       | 0.088609       |

TABLE S16: Differences between Type 2 Diabetes and Cirrhosis ARO terms

| Lineage                                                               | LOG2FC | Direction | pvalue   |
|-----------------------------------------------------------------------|--------|-----------|----------|
| tetO                                                                  | 14.62  | Cirrhosis | 1.00E-06 |
| Bifidobacteria_intrinsic_ileS_conferring_resistance_to_mupirocin      | 14.44  | Cirrhosis | 1.00E-06 |
| Mef_En2                                                               | 13.88  | Cirrhosis | 1.00E-06 |
| adeF                                                                  | 13.65  | Cirrhosis | 1.00E-06 |
| TEM_83                                                                | 13.65  | Cirrhosis | 1.00E-06 |
| ErmF                                                                  | 13.59  | Cirrhosis | 1.00E-06 |
| sul1                                                                  | 13.01  | Cirrhosis | 1.00E-06 |
| msbA                                                                  | 12.68  | Cirrhosis | 1.00E-06 |
| ErmB                                                                  | 12.62  | Cirrhosis | 1.00E-06 |
| acrB                                                                  | 12.36  | Cirrhosis | 1.00E-06 |
| CfxA6                                                                 | 12.2   | Cirrhosis | 1.00E-06 |
| mdtM                                                                  | 12.18  | Cirrhosis | 1.00E-06 |
| yojI                                                                  | 12     | Cirrhosis | 1.00E-06 |
| cpxA                                                                  | 11.93  | Cirrhosis | 1.00E-06 |
| tetM                                                                  | 11.72  | Cirrhosis | 1.00E-06 |
| Bifidobacterium_adolescentis_rpoB_conferring_resistance_to_rifampicin | 11.62  | Cirrhosis | 1.00E-06 |
| aad_6                                                                 | 11.6   | Cirrhosis | 1.00E-06 |
| mdtN                                                                  | 11.5   | Cirrhosis | 1.00E-06 |
| emrB                                                                  | 11.3   | Cirrhosis | 1.00E-06 |
| dfrF                                                                  | 10.91  | Cirrhosis | 1.00E-06 |
| Escherichia_coli_mdfA                                                 | 10.89  | Cirrhosis | 1.00E-06 |
| CblA_1                                                                | 10.87  | Cirrhosis | 1.00E-06 |
| CTX_M_83                                                              | 10.87  | Cirrhosis | 1.00E-06 |
| cepA_beta_lactamase                                                   | 10.67  | Cirrhosis | 1.00E-06 |
| acrE                                                                  | 10.61  | Cirrhosis | 1.00E-06 |
| CfxA                                                                  | 10.46  | Cirrhosis | 1.00E-06 |
| CTX_M_86                                                              | 10.46  | Cirrhosis | 1.00E-06 |
| bacA                                                                  | 10.43  | Cirrhosis | 1.00E-06 |
| mdtH                                                                  | 10.35  | Cirrhosis | 1.00E-06 |
| CTX_M_16                                                              | 10.32  | Cirrhosis | 1.00E-06 |
| CTX_M_50                                                              | 10.32  | Cirrhosis | 1.00E-06 |
| aadA12                                                                | 10.15  | Cirrhosis | 1.00E-06 |
| cdeA                                                                  | 10.15  | Cirrhosis | 1.00E-06 |
| QnrB8                                                                 | 10.15  | Cirrhosis | 1.00E-06 |
| CfxA4                                                                 | 9.97   | Cirrhosis | 1.00E-06 |
| CTX_M_9                                                               | 9.97   | Cirrhosis | 1.00E-06 |
| dfrA15                                                                | 9.97   | Cirrhosis | 1.00E-06 |

|                            |      |           |          |
|----------------------------|------|-----------|----------|
| mdtO                       | 9.97 | Cirrhosis | 1.00E-06 |
| CfxA2                      | 9.7  | Cirrhosis | 1.00E-06 |
| CTX_M_87                   | 9.7  | Cirrhosis | 1.00E-06 |
| cmx                        | 9.69 | Cirrhosis | 1.00E-06 |
| mdtC                       | 9.69 | Cirrhosis | 1.00E-06 |
| acrS                       | 9.36 | Cirrhosis | 1.00E-06 |
| TEM_80                     | 9.36 | Cirrhosis | 1.00E-06 |
| gadW                       | 9.17 | Cirrhosis | 1.00E-06 |
| pmrF                       | 9    | Cirrhosis | 1.00E-06 |
| oleB                       | 8.94 | Cirrhosis | 1.00E-06 |
| Klebsiella_pneumoniae_acrA | 8.92 | Cirrhosis | 1.00E-06 |
| SHV_155                    | 8.81 | Cirrhosis | 1.00E-06 |
| IsaC                       | 8.66 | Cirrhosis | 1.79E-06 |
| MexC                       | 8.65 | Cirrhosis | 1.00E-06 |
| ANT_6_la                   | 8.56 | Cirrhosis | 1.00E-06 |
| tet32                      | 8.49 | Cirrhosis | 1.00E-06 |
| tetU                       | 8.41 | Cirrhosis | 1.00E-06 |
| vanSD                      | 8.27 | Cirrhosis | 1.00E-06 |
| vanRG                      | 8.23 | Cirrhosis | 1.00E-06 |
| vanRD                      | 8.22 | Cirrhosis | 1.00E-06 |
| OprN                       | 8.2  | Cirrhosis | 1.00E-06 |
| APH_3_IIb                  | 8.2  | Cirrhosis | 1.00E-06 |
| TEM_157                    | 8.19 | Cirrhosis | 1.00E-06 |
| CfxA5                      | 8.02 | Cirrhosis | 1.00E-06 |
| CTX_M_90                   | 8.02 | Cirrhosis | 1.00E-06 |
| emrA                       | 8.01 | Cirrhosis | 1.00E-06 |
| aadA16                     | 7.98 | Cirrhosis | 1.00E-06 |
| PDC_3                      | 7.81 | Cirrhosis | 1.00E-06 |
| NmcA_beta_lactamase        | 7.8  | Cirrhosis | 1.00E-06 |
| SHV_126                    | 7.77 | Cirrhosis | 1.00E-06 |
| AAC_3_lb                   | 7.7  | Cirrhosis | 1.00E-06 |
| efmA                       | 7.65 | Cirrhosis | 2.46E-06 |
| vanD                       | 7.51 | Cirrhosis | 0.022647 |
| CMY_71                     | 7.36 | Cirrhosis | 1.00E-06 |
| CTX_M_117                  | 7.36 | Cirrhosis | 1.00E-06 |
| aadS                       | 7.3  | Cirrhosis | 1.00E-06 |
| TEM_40                     | 7.28 | Cirrhosis | 1.09E-06 |
| DES_1                      | 7.26 | Cirrhosis | 1.00E-06 |
| Enterobacter_cloacae_acrA  | 7.26 | Cirrhosis | 1.00E-06 |

|                             |      |           |          |
|-----------------------------|------|-----------|----------|
| mdtK                        | 7.23 | Cirrhosis | 1.00E-06 |
| ramA                        | 7.04 | Cirrhosis | 1.00E-06 |
| emeA                        | 7.01 | Cirrhosis | 0.004884 |
| aadA5                       | 7    | Cirrhosis | 1.76E-05 |
| TEM_6                       | 7    | Cirrhosis | 1.76E-05 |
| ErmC                        | 6.97 | Cirrhosis | 1.00E-06 |
| arlS                        | 6.89 | Cirrhosis | 1.00E-06 |
| TEM_95                      | 6.89 | Cirrhosis | 1.00E-06 |
| adeS                        | 6.85 | Cirrhosis | 3.54E-05 |
| efrA                        | 6.85 | Cirrhosis | 3.54E-05 |
| tolC                        | 6.79 | Cirrhosis | 1.00E-06 |
| Klebsiella_pneumoniae_KpnE  | 6.74 | Cirrhosis | 1.00E-06 |
| catA8                       | 6.67 | Cirrhosis | 1.00E-06 |
| gadX                        | 6.67 | Cirrhosis | 1.00E-06 |
| Escherichia_coli_ampC       | 6.63 | Cirrhosis | 1.00E-06 |
| Pseudomonas_aeruginosa_CpxR | 6.57 | Cirrhosis | 6.10E-05 |
| adeB                        | 6.51 | Cirrhosis | 1.00E-06 |
| TEM_81                      | 6.51 | Cirrhosis | 1.00E-06 |
| TEM_1                       | 6.32 | Cirrhosis | 6.70E-04 |
| MexA                        | 6.29 | Cirrhosis | 1.07E-06 |
| TEM_219                     | 6.21 | Cirrhosis | 0.001353 |
| APH_2_Ig                    | 6.04 | Cirrhosis | 0.003131 |
| cmlA6                       | 5.95 | Cirrhosis | 1.00E-06 |
| mdtA                        | 5.95 | Cirrhosis | 1.00E-06 |
| tetB_46                     | 5.86 | Cirrhosis | 1.00E-06 |
| ugd                         | 5.84 | Cirrhosis | 1.00E-06 |
| oqxB                        | 5.82 | Cirrhosis | 1.00E-06 |
| pmrA                        | 5.78 | Cirrhosis | 3.70E-06 |
| AAC_6_Ib3                   | 5.76 | Cirrhosis | 1.79E-06 |
| AAC_6_Im                    | 5.76 | Cirrhosis | 1.79E-06 |
| TEM_206                     | 5.7  | Cirrhosis | 0.012626 |
| catI                        | 5.68 | Cirrhosis | 1.00E-06 |
| TaeA                        | 5.67 | Cirrhosis | 1.00E-06 |
| TEM_217                     | 5.67 | Cirrhosis | 1.00E-06 |
| Escherichia_coli_acrA       | 5.61 | Cirrhosis | 1.00E-06 |
| mexN                        | 5.57 | Cirrhosis | 1.00E-06 |
| vanRF                       | 5.32 | Cirrhosis | 0.048336 |
| TEM_178                     | 5.3  | Cirrhosis | 7.45E-04 |
| TEM_57                      | 5.3  | Cirrhosis | 7.45E-04 |

|                                                                                  |      |           |          |
|----------------------------------------------------------------------------------|------|-----------|----------|
| APH_2_IIIa                                                                       | 5.17 | Cirrhosis | 6.29E-04 |
| APH_3_Ia                                                                         | 5.17 | Cirrhosis | 6.29E-04 |
| APH_6_Ic                                                                         | 5.16 | Cirrhosis | 4.87E-05 |
| Tet_X3                                                                           | 5.15 | Cirrhosis | 1.00E-06 |
| CfxA3                                                                            | 5.11 | Cirrhosis | 1.00E-06 |
| patB                                                                             | 4.98 | Cirrhosis | 1.00E-06 |
| RlmA_II                                                                          | 4.77 | Cirrhosis | 1.61E-05 |
| TriC                                                                             | 4.73 | Cirrhosis | 1.01E-06 |
| Klebsiella_pneumoniae_KpnH                                                       | 4.57 | Cirrhosis | 1.00E-06 |
| aadA                                                                             | 4.54 | Cirrhosis | 3.77E-05 |
| TEM_33                                                                           | 4.54 | Cirrhosis | 3.77E-05 |
| patA                                                                             | 4.53 | Cirrhosis | 1.00E-06 |
| mexJ                                                                             | 4.52 | Cirrhosis | 1.06E-06 |
| vanXYG                                                                           | 4.47 | Cirrhosis | 2.70E-06 |
| PC1_beta_lactamase_blaZ                                                          | 4.47 | Cirrhosis | 2.86E-05 |
| mexK                                                                             | 4.45 | Cirrhosis | 1.00E-06 |
| vanSA                                                                            | 4.19 | Cirrhosis | 1.00E-04 |
| evgA                                                                             | 4.14 | Cirrhosis | 1.00E-06 |
| mexW                                                                             | 3.99 | Cirrhosis | 1.01E-06 |
| Klebsiella_pneumoniae_OmpK37                                                     | 3.94 | Cirrhosis | 1.00E-06 |
| MuxC                                                                             | 3.93 | Cirrhosis | 1.00E-06 |
| srmB                                                                             | 3.66 | Cirrhosis | 1.00E-06 |
| msrC                                                                             | 3.65 | Cirrhosis | 1.00E-06 |
| Tet_X4                                                                           | 3.63 | Cirrhosis | 1.00E-06 |
| smeR                                                                             | 3.62 | Cirrhosis | 5.15E-05 |
| mexH                                                                             | 3.55 | Cirrhosis | 1.00E-06 |
| Pseudomonas_aeruginosa_soxR                                                      | 3.55 | Cirrhosis | 0.043554 |
| Erm_35                                                                           | 3.54 | Cirrhosis | 1.87E-04 |
| emrK                                                                             | 3.51 | Cirrhosis | 1.00E-06 |
| efpA                                                                             | 3.48 | Cirrhosis | 1.00E-06 |
| vanRA                                                                            | 3.42 | Cirrhosis | 4.46E-05 |
| mphA                                                                             | 3.4  | Cirrhosis | 2.90E-06 |
| AxyY                                                                             | 3.33 | Cirrhosis | 1.03E-06 |
| EreA2                                                                            | 3.27 | Cirrhosis | 0.03659  |
| aadA24                                                                           | 3.22 | Cirrhosis | 9.07E-04 |
| TEM_53                                                                           | 3.22 | Cirrhosis | 9.07E-04 |
| Streptomyces_rishiriensis_parY_mutant_<br>conferring_resistance_to_aminocoumarin | 3.16 | Cirrhosis | 1.00E-06 |
| macB                                                                             | 3.11 | Cirrhosis | 1.00E-06 |
| mel                                                                              | 3.05 | Cirrhosis | 1.00E-06 |

|                                                                  |       |           |          |
|------------------------------------------------------------------|-------|-----------|----------|
| otr_A                                                            | 2.96  | Cirrhosis | 0.005336 |
| vanXD                                                            | 2.93  | Cirrhosis | 0.001084 |
| msrE                                                             | 2.92  | Cirrhosis | 4.08E-06 |
| lmrD                                                             | 2.92  | Cirrhosis | 0.040443 |
| APH_3_IIIa                                                       | 2.86  | Cirrhosis | 1.02E-06 |
| tetX                                                             | 2.83  | Cirrhosis | 1.00E-06 |
| Nocardia_rifampin_resistant_beta_subunit_of_RNA_polymerase_rpoB2 | 2.8   | Cirrhosis | 1.00E-06 |
| SAT_4                                                            | 2.75  | Cirrhosis | 1.51E-06 |
| mexI                                                             | 2.69  | Cirrhosis | 1.00E-06 |
| CTX_M_76                                                         | 2.67  | Cirrhosis | 8.37E-06 |
| MuxB                                                             | 2.62  | Cirrhosis | 1.88E-06 |
| catS                                                             | 2.57  | Cirrhosis | 1.47E-06 |
| vanI                                                             | 2.48  | Cirrhosis | 3.07E-06 |
| TEM_102                                                          | 2.38  | Cirrhosis | 0.006295 |
| tlrC                                                             | 2.31  | Cirrhosis | 1.40E-06 |
| LlmA_23S_ribosomal_RNA_methyltransferase                         | 2.29  | Cirrhosis | 0.001588 |
| MexB                                                             | 2.25  | Cirrhosis | 5.01E-06 |
| MexD                                                             | 2.06  | Cirrhosis | 3.75E-04 |
| adeK                                                             | 2.04  | Cirrhosis | 0.037499 |
| AAC_3_IIb                                                        | 2.02  | Cirrhosis | 1.02E-06 |
| smeF                                                             | 1.95  | Cirrhosis | 0.04268  |
| tetA_46                                                          | 1.93  | Cirrhosis | 0.010021 |
| mtrD                                                             | 1.87  | Cirrhosis | 0.001932 |
| vanTG                                                            | 1.87  | Cirrhosis | 0.017352 |
| smeE                                                             | 1.86  | Cirrhosis | 4.11E-05 |
| evgS                                                             | 1.84  | Cirrhosis | 6.55E-06 |
| kdpE                                                             | 1.82  | Cirrhosis | 1.55E-06 |
| SHV_11                                                           | 1.69  | Cirrhosis | 0.043402 |
| OXA_184                                                          | 1.66  | Cirrhosis | 0.032493 |
| tet_C                                                            | 1.65  | Cirrhosis | 0.034882 |
| SAT_1                                                            | 1.56  | Cirrhosis | 0.013294 |
| arnA                                                             | 1.51  | Cirrhosis | 0.00664  |
| qepA                                                             | 1.38  | Cirrhosis | 0.033017 |
| tetW                                                             | 1.16  | Cirrhosis | 0.042933 |
| tet_W_N_W                                                        | 1.12  | Cirrhosis | 0.023633 |
| ACI_1                                                            | 1.11  | Cirrhosis | 1.00E-06 |
| APH_6_Id                                                         | -1.1  | T2D       | 1.00E-06 |
| mphE                                                             | -1.22 | T2D       | 1.00E-06 |
| sul2                                                             | -1.23 | T2D       | 1.00E-06 |

|                                                         |       |     |          |
|---------------------------------------------------------|-------|-----|----------|
| AAC_6_lb7                                               | -1.25 | T2D | 7.30E-05 |
| lsaE                                                    | -1.26 | T2D | 0.007313 |
| Enterococcus_faecalis_chloramphenicol_acetyltransferase | -1.27 | T2D | 1.25E-04 |
| AAC_3_Ile                                               | -1.31 | T2D | 4.14E-06 |
| mexQ                                                    | -1.74 | T2D | 1.00E-06 |
| TEM_47                                                  | -1.77 | T2D | 0.004306 |
| sdiA                                                    | -1.87 | T2D | 1.00E-06 |
| FosA5                                                   | -1.93 | T2D | 1.00E-06 |
| Erm_49                                                  | -1.96 | T2D | 0.004757 |
| catP                                                    | -1.98 | T2D | 2.19E-06 |
| AAC_3_Ilc                                               | -2    | T2D | 3.86E-06 |
| smeB                                                    | -2.23 | T2D | 1.00E-06 |
| AAC_3_Ild                                               | -2.29 | T2D | 1.00E-06 |
| OXA_209                                                 | -2.31 | T2D | 1.00E-06 |
| lmrC                                                    | -2.33 | T2D | 1.08E-06 |
| floR                                                    | -2.4  | T2D | 1.87E-06 |
| LnuP                                                    | -2.46 | T2D | 0.023913 |
| Escherichia_coli_ampC1_beta_lactamase                   | -2.62 | T2D | 1.00E-06 |
| ErmT                                                    | -2.67 | T2D | 1.00E-06 |
| MuxA                                                    | -2.71 | T2D | 1.00E-06 |
| cmlA1                                                   | -2.81 | T2D | 0.001553 |
| mdsA                                                    | -2.81 | T2D | 0.001553 |
| TEM_110                                                 | -2.87 | T2D | 1.00E-06 |
| ErmQ                                                    | -3.13 | T2D | 0.011063 |
| vanHD                                                   | -3.42 | T2D | 1.00E-06 |
| vanRC                                                   | -3.44 | T2D | 1.00E-06 |
| novA                                                    | -3.45 | T2D | 1.00E-06 |
| OXA_347                                                 | -3.49 | T2D | 1.00E-06 |
| aadA3                                                   | -3.54 | T2D | 5.98E-05 |
| vanRE                                                   | -3.58 | T2D | 0.007747 |
| vanRM                                                   | -3.67 | T2D | 1.02E-06 |
| FosA6                                                   | -3.92 | T2D | 1.00E-06 |
| CMY_9                                                   | -4.03 | T2D | 1.00E-06 |
| arr_3                                                   | -4.3  | T2D | 1.00E-06 |
| opmE                                                    | -4.5  | T2D | 1.00E-06 |
| APH_2_If                                                | -4.6  | T2D | 1.00E-06 |
| CTX_M_141                                               | -4.62 | T2D | 1.00E-06 |
| dfrA32                                                  | -4.73 | T2D | 9.21E-05 |
| Escherichia_coli_emrE                                   | -4.8  | T2D | 1.00E-06 |

|                                  |        |     |          |
|----------------------------------|--------|-----|----------|
| CTX_M_66                         | -4.92  | T2D | 1.00E-06 |
| aadA13                           | -5.83  | T2D | 1.00E-06 |
| rmtF                             | -6.41  | T2D | 1.00E-06 |
| tetB_60                          | -6.49  | T2D | 1.00E-06 |
| mtrA                             | -6.67  | T2D | 1.00E-06 |
| vmIR                             | -6.9   | T2D | 1.00E-06 |
| mtrC                             | -7.05  | T2D | 1.00E-06 |
| lnuF                             | -7.58  | T2D | 1.00E-06 |
| CcrA_beta_lactamase              | -7.6   | T2D | 3.82E-04 |
| salA                             | -8.27  | T2D | 1.00E-06 |
| LEN_34                           | -8.45  | T2D | 1.00E-06 |
| rphA                             | -8.8   | T2D | 1.00E-06 |
| catII_from_Escherichia_coli_K_12 | -8.83  | T2D | 1.00E-06 |
| FosA4                            | -8.83  | T2D | 1.00E-06 |
| CTX_M_77                         | -9.02  | T2D | 1.00E-06 |
| DHA_17                           | -9.09  | T2D | 1.00E-06 |
| vanXB                            | -9.24  | T2D | 1.00E-06 |
| DHA_15                           | -9.43  | T2D | 1.00E-06 |
| dfrA19                           | -9.46  | T2D | 1.00E-06 |
| smeA                             | -9.77  | T2D | 1.00E-06 |
| dfrA7                            | -10.07 | T2D | 1.00E-06 |
| DHA_12                           | -10.21 | T2D | 1.00E-06 |
| CMY_117                          | -11.88 | T2D | 1.00E-06 |

Table S17: AMR Gene Family differences Type 2 Diabetes vs Cirrhosis

| Lineage                                                        | LOG2FC | Direction | pvalue   |
|----------------------------------------------------------------|--------|-----------|----------|
| Erm_23S_ribosomal_RNA_methyltransferase                        | 14.34  | Cirrhosis | 1.00E-06 |
| CfxA_beta_lactamase                                            | 14.25  | Cirrhosis | 1.00E-06 |
| ABC_F_ATP_binding_cassette_ribosomal_protection_protein        | 13.4   | Cirrhosis | 1.00E-06 |
| pmr_phosphoethanolamine_transferase                            | 13.06  | Cirrhosis | 1.00E-06 |
| APH_2                                                          | 12.81  | Cirrhosis | 1.00E-06 |
| sulfonamide_resistant_sul                                      | 12.57  | Cirrhosis | 1.00E-06 |
| aminocoumarin_resistant_parY                                   | 12.27  | Cirrhosis | 1.00E-06 |
| trimethoprim_resistant_dihydrofolate_reductase_dfr             | 11.86  | Cirrhosis | 1.00E-06 |
| lincosamide_nucleotidyltransferase_LNU                         | 11.7   | Cirrhosis | 1.00E-06 |
| chloramphenicol_acetyltransferase_CAT                          | 10.89  | Cirrhosis | 1.00E-06 |
| ANT_3                                                          | 10.88  | Cirrhosis | 1.00E-06 |
| ciprofloxacin_phosphotransferase                               | 9.8    | Cirrhosis | 1.00E-06 |
| macrolide_phosphotransferase_MPH                               | 9.8    | Cirrhosis | 1.00E-06 |
| kdpDE                                                          | 9.66   | Cirrhosis | 1.00E-06 |
| OXA_beta_lactamase                                             | 9.31   | Cirrhosis | 1.00E-06 |
| vanY                                                           | 9.1    | Cirrhosis | 0.024397 |
| fosfomycin_thiol_transferase                                   | 8.31   | Cirrhosis | 1.00E-06 |
| VIM_beta_lactamase                                             | 8.31   | Cirrhosis | 1.00E-06 |
| PDC_beta_lactamase                                             | 8.07   | Cirrhosis | 1.00E-06 |
| NmcA_beta_lactamase                                            | 7.99   | Cirrhosis | 1.00E-06 |
| SHV_beta_lactamase                                             | 5.79   | Cirrhosis | 1.00E-06 |
| antibiotic_resistant_ileucyl_tRNA_synthetase_ileS              | 5.63   | Cirrhosis | 1.00E-06 |
| CARB_beta_lactamase                                            | 5.33   | Cirrhosis | 4.26E-05 |
| CMY_beta_lactamase                                             | 5.33   | Cirrhosis | 4.26E-05 |
| vanX                                                           | 5.23   | Cirrhosis | 0.001235 |
| rifamycin_resistant_beta_subunit_of_RNA_polymerase_rpoB        | 5.15   | Cirrhosis | 1.00E-06 |
| tetracycline_resistant_ribosomal_protection_protein            | 4.95   | Cirrhosis | 1.00E-06 |
| non_erm_23S_ribosomal_RNA_methyltransferase_G748               | 4.89   | Cirrhosis | 2.14E-06 |
| resistance_nodulation_cell_division_RND_antibiotic_efflux_pump | 4.68   | Cirrhosis | 1.00E-06 |
| APH_6                                                          | 4.53   | Cirrhosis | 1.00E-06 |
| vanS                                                           | 4.34   | Cirrhosis | 1.00E-06 |
| multidrug_and_toxic_compound_extrusion_MATE_transporter        | 3.63   | Cirrhosis | 1.00E-06 |
| ACI_beta_lactamase                                             | 3.36   | Cirrhosis | 1.05E-06 |
| ATP_binding_cassette_ABC_antibiotic_efflux_pump                | 3.21   | Cirrhosis | 1.00E-06 |
| RbpA_bacterial_RNA_polymerase_binding_protein                  | 2.86   | Cirrhosis | 0.016622 |
| Llm_23S_ribosomal_RNA_methyltransferase                        | 2.85   | Cirrhosis | 5.68E-05 |
| tetracycline_inactivation_enzyme                               | 2.74   | Cirrhosis | 1.02E-06 |
| glycopeptide_resistance_gene_cluster                           | 2.41   | Cirrhosis | 1.87E-05 |
| cepA_beta_lactamase                                            | 2.3    | Cirrhosis | 0.008537 |
| ANT_6                                                          | 1.65   | Cirrhosis | 5.48E-05 |
| AAC_3                                                          | 1.1    | Cirrhosis | 0.028115 |
| macrolide_esterase                                             | -1.64  | T2D       | 1.00E-06 |
| vanZ                                                           | -2.01  | T2D       | 1.00E-06 |

|                                             |       |     |          |
|---------------------------------------------|-------|-----|----------|
| CcrA_beta_lactamase                         | -2.83 | T2D | 8.27E-04 |
| APH_4                                       | -3.94 | T2D | 1.00E-06 |
| vanW                                        | -4.29 | T2D | 1.00E-06 |
| SRT_beta_lactamase                          | -4.92 | T2D | 1.00E-06 |
| undecaprenyl_pyrophosphate_related_proteins | -5.46 | T2D | 1.00E-06 |
| CepS_beta_lactamase                         | -6.76 | T2D | 1.00E-06 |
| rifampin_phosphotransferase                 | -6.81 | T2D | 1.00E-06 |
| rifampin_ADPrbosyltransferase_Arr           | -7.94 | T2D | 1.00E-06 |
| ACC_beta_lactamase                          | -9.81 | T2D | 1.00E-06 |

Table S18: Resistomes Type 2 Diabetes vs Cirrhosis

| Lineage                                | LOG2FC | Direction | pvalue   |
|----------------------------------------|--------|-----------|----------|
| <i>Bifidobacterium_adolescentis</i>    | 15.31  | Cirrhosis | 1.00E-06 |
| <i>Campylobacter_jejuni</i>            | 14.77  | Cirrhosis | 1.00E-06 |
| <i>Enterococcus_faecium</i>            | 14.29  | Cirrhosis | 1.00E-06 |
| <i>Klebsiella_pneumoniae</i>           | 14.26  | Cirrhosis | 1.00E-06 |
| <i>Enterobacter_hormaechei</i>         | 13.17  | Cirrhosis | 1.00E-06 |
| <i>Campylobacter_coli</i>              | 13.14  | Cirrhosis | 1.00E-06 |
| <i>uncultured_bacterium</i>            | 12.99  | Cirrhosis | 1.00E-06 |
| <i>Transposon_Tn4551</i>               | 12.89  | Cirrhosis | 1.00E-06 |
| <i>Enterobacter_asburiae</i>           | 12.2   | Cirrhosis | 1.00E-06 |
| <i>Streptococcus_australis</i>         | 12.19  | Cirrhosis | 1.00E-06 |
| <i>Brucella_melitensis</i>             | 11.95  | Cirrhosis | 1.00E-06 |
| <i>Butyrivibrio_fibrisolvens</i>       | 11.95  | Cirrhosis | 1.00E-06 |
| <i>Streptococcus_agalactiae</i>        | 11.95  | Cirrhosis | 1.00E-06 |
| <i>Prevotella_intermedia</i>           | 11.72  | Cirrhosis | 1.00E-06 |
| <i>Shigella_sp</i>                     | 10.38  | Cirrhosis | 1.00E-06 |
| <i>Streptococcus_pyogenes</i>          | 10.38  | Cirrhosis | 1.00E-06 |
| <i>Macrococcus_caseolyticus</i>        | 9.97   | Cirrhosis | 1.00E-06 |
| <i>Neisseria_gonorrhoeae</i>           | 9.97   | Cirrhosis | 1.00E-06 |
| <i>Pseudomonas_sp</i>                  | 9.58   | Cirrhosis | 1.00E-06 |
| <i>Shigella_sonnei</i>                 | 9.58   | Cirrhosis | 1.00E-06 |
| <i>Campylobacter_fetus</i>             | 9.44   | Cirrhosis | 1.00E-06 |
| <i>Streptomyces_ambofaciens</i>        | 8.5    | Cirrhosis | 1.00E-06 |
| <i>Plasmid_pNG2</i>                    | 8.29   | Cirrhosis | 1.17E-05 |
| <i>Proteus_mirabilis</i>               | 8.27   | Cirrhosis | 0.022835 |
| <i>Parabacteroides_distasonis</i>      | 7.9    | Cirrhosis | 1.00E-06 |
| <i>Bacteroides_coproisus</i>           | 7.55   | Cirrhosis | 1.00E-06 |
| <i>Desulfitobacterium_hafniense</i>    | 7.39   | Cirrhosis | 1.01E-06 |
| <i>Bifidobacterium_bifidum</i>         | 7.18   | Cirrhosis | 1.00E-06 |
| <i>Klebsiella_aerogenes</i>            | 6.49   | Cirrhosis | 1.25E-06 |
| <i>Mycobacterium_tuberculosis</i>      | 6.45   | Cirrhosis | 1.00E-06 |
| <i>Klebsiella_sp</i>                   | 6.19   | Cirrhosis | 2.73E-06 |
| <i>Haemophilus_parainfluenzae</i>      | 6.02   | Cirrhosis | 0.020293 |
| <i>Staphylococcus_pseudintermedius</i> | 5.39   | Cirrhosis | 0.035511 |
| <i>Vibrio_paraahaemolyticus</i>        | 5.18   | Cirrhosis | 1.00E-06 |
| <i>Klebsiella_oxytoca</i>              | 4.78   | Cirrhosis | 1.00E-06 |
| <i>Paenibacillus_sp</i>                | 4.5    | Cirrhosis | 1.00E-06 |
| <i>Salmonella_enterica</i>             | 4.47   | Cirrhosis | 1.00E-06 |
| <i>Streptococcus_oralis</i>            | 4.19   | Cirrhosis | 3.51E-06 |
| <i>Pseudomonas_fluorescens</i>         | 3.93   | Cirrhosis | 1.00E-06 |
| <i>Achromobacter_insuaavis</i>         | 3.64   | Cirrhosis | 1.42E-06 |
| <i>Streptomyces_niveus</i>             | 2.96   | Cirrhosis | 2.23E-05 |
| <i>Streptomyces_rimosus</i>            | 2.64   | Cirrhosis | 0.008216 |
| <i>Nocardia_farcinica</i>              | 2.57   | Cirrhosis | 1.00E-06 |

|                                       |       |           |          |
|---------------------------------------|-------|-----------|----------|
| <i>Acinetobacter_nosocomialis</i>     | 2.55  | Cirrhosis | 1.00E-06 |
| <i>Streptomyces_antibioticus</i>      | 2.52  | Cirrhosis | 1.00E-06 |
| <i>Citrobacter_youngae</i>            | 2.22  | Cirrhosis | 0.007497 |
| <i>Streptomyces_fradiae</i>           | 2.14  | Cirrhosis | 3.54E-06 |
| <i>Serratia_marcescens</i>            | 2.1   | Cirrhosis | 3.13E-05 |
| <i>Stenotrophomonas_maltophilia</i>   | 1.59  | Cirrhosis | 7.41E-06 |
| <i>Clostridioides_difficile</i>       | 1.54  | Cirrhosis | 2.94E-04 |
| <i>Haemophilus_influenzae</i>         | 1.49  | Cirrhosis | 0.017403 |
| <i>mixed_culture</i>                  | 1.28  | Cirrhosis | 0.02752  |
| <i>Enterococcus_faecalis</i>          | 1.05  | Cirrhosis | 0.045903 |
| <i>Shigella_dysenteriae</i>           | -1.28 | T2D       | 1.02E-06 |
| <i>Citrobacter_amalonaticus</i>       | -1.33 | T2D       | 1.00E-06 |
| <i>Enterococcus_casseliflavus</i>     | -1.62 | T2D       | 2.28E-04 |
| <i>Citrobacter_freundii</i>           | -1.63 | T2D       | 1.00E-06 |
| <i>Vibrio_cholerae</i>                | -2.57 | T2D       | 1.00E-06 |
| <i>Proteobacteria</i>                 | -3.2  | T2D       | 0.001385 |
| <i>Plasmid_pGT633</i>                 | -3.64 | T2D       | 1.00E-06 |
| <i>Lactococcus_lactis</i>             | -3.67 | T2D       | 1.00E-06 |
| <i>Mycolicibacterium_smegmatis</i>    | -3.75 | T2D       | 0.045636 |
| <i>Vibrio_anguillarum</i>             | -4.19 | T2D       | 1.70E-06 |
| <i>Francisella_tularensis</i>         | -4.57 | T2D       | 1.00E-06 |
| <i>Pantoea_agglomerans</i>            | -4.78 | T2D       | 9.43E-05 |
| <i>Enterococcus_gallinarum</i>        | -4.85 | T2D       | 1.00E-06 |
| <i>Rhodococcus_hoagii</i>             | -5.21 | T2D       | 1.00E-06 |
| <i>Staphylococcus_sciuri</i>          | -5.87 | T2D       | 1.00E-06 |
| <i>Citrobacter_braakii</i>            | -6.3  | T2D       | 1.00E-06 |
| <i>Aeromonas_salmonicida</i>          | -6.95 | T2D       | 1.00E-06 |
| <i>Legionella_pneumophila</i>         | -7.83 | T2D       | 1.00E-06 |
| <i>Geobacillus_stearothermophilus</i> | -7.89 | T2D       | 1.00E-06 |
| <i>Proteus_vulgaris</i>               | -8.2  | T2D       | 1.00E-06 |
| <i>Brachyspira_pilosicoli</i>         | -11.9 | T2D       | 1.00E-06 |

Table S19: Differences between CKD and Cirrhosis ARO terms

| Lineage                                                              | LOG2FC | Direction | pvalue   |
|----------------------------------------------------------------------|--------|-----------|----------|
| Bifidobacterium_adolescentis_rpoB_confering_resistance_to_rifampicin | 15.52  | Cirrhosis | 1.00E-06 |
| adeF                                                                 | 14.65  | Cirrhosis | 1.00E-06 |
| Mef_En2                                                              | 13.87  | Cirrhosis | 1.00E-06 |
| ErmF                                                                 | 13.6   | Cirrhosis | 1.00E-06 |
| acrD                                                                 | 12.23  | Cirrhosis | 1.00E-06 |
| aad_6                                                                | 11.67  | Cirrhosis | 1.00E-06 |
| CfxA5                                                                | 11.6   | Cirrhosis | 1.00E-06 |
| Escherichia_coli_ampC1_beta_lactamase                                | 11.49  | Cirrhosis | 1.00E-06 |
| Tet_X3                                                               | 11.16  | Cirrhosis | 1.00E-06 |
| cdeA                                                                 | 11.09  | Cirrhosis | 1.00E-06 |
| Tet_X4                                                               | 11.07  | Cirrhosis | 1.00E-06 |
| cepA_beta_lactamase                                                  | 10.7   | Cirrhosis | 1.00E-06 |
| APH_3_Ib                                                             | 10.59  | Cirrhosis | 1.00E-06 |
| baeS                                                                 | 10.56  | Cirrhosis | 1.00E-06 |
| mexH                                                                 | 10.46  | Cirrhosis | 1.00E-06 |
| bacA                                                                 | 10.43  | Cirrhosis | 1.00E-06 |
| acrS                                                                 | 10.38  | Cirrhosis | 1.00E-06 |
| QnrB8                                                                | 10.11  | Cirrhosis | 1.00E-06 |
| SAT_4                                                                | 10.03  | Cirrhosis | 1.00E-06 |
| aadA8b                                                               | 9.84   | Cirrhosis | 1.00E-06 |
| catI                                                                 | 9.56   | Cirrhosis | 1.00E-06 |
| Escherichia_coli_emrE                                                | 9.38   | Cirrhosis | 1.00E-06 |
| arnA                                                                 | 8.73   | Cirrhosis | 1.00E-06 |
| MexC                                                                 | 8.73   | Cirrhosis | 1.00E-06 |
| TEM_205                                                              | 8.69   | Cirrhosis | 1.00E-06 |
| ANT_6_Ia                                                             | 8.6    | Cirrhosis | 1.00E-06 |
| mexN                                                                 | 8.19   | Cirrhosis | 1.00E-06 |
| APH_3_IIb                                                            | 8.14   | Cirrhosis | 1.00E-06 |
| OprN                                                                 | 8.07   | Cirrhosis | 1.00E-06 |
| NmcA_beta_lactamase                                                  | 7.89   | Cirrhosis | 1.00E-06 |
| PDC_3                                                                | 7.86   | Cirrhosis | 1.00E-06 |
| AAC_3_Ib                                                             | 7.79   | Cirrhosis | 1.00E-06 |
| SHV_126                                                              | 7.76   | Cirrhosis | 1.02E-06 |
| SHV_160                                                              | 7.67   | Cirrhosis | 1.49E-06 |
| TriC                                                                 | 7.49   | Cirrhosis | 1.10E-06 |
| aadA24                                                               | 7.48   | Cirrhosis | 2.79E-04 |

|                                          |      |           |          |
|------------------------------------------|------|-----------|----------|
| MexA                                     | 7.47 | Cirrhosis | 1.33E-06 |
| mexJ                                     | 7.44 | Cirrhosis | 1.31E-06 |
| catS                                     | 7.42 | Cirrhosis | 1.00E-06 |
| opmE                                     | 7.41 | Cirrhosis | 3.65E-06 |
| lsaA                                     | 7.31 | Cirrhosis | 0.014443 |
| SHV_155                                  | 7.26 | Cirrhosis | 1.00E-06 |
| LlmA_23S_ribosomal_RNA_methyltransferase | 7.1  | Cirrhosis | 8.14E-06 |
| CTX_M_76                                 | 6.64 | Cirrhosis | 0.00859  |
| arIS                                     | 6.56 | Cirrhosis | 1.00E-06 |
| APH_6_lc                                 | 6.55 | Cirrhosis | 0.001035 |
| tetA_46                                  | 6.53 | Cirrhosis | 1.00E-06 |
| Pseudomonas_aeruginosa_CpxR              | 6.48 | Cirrhosis | 8.63E-04 |
| adeB                                     | 6.45 | Cirrhosis | 1.03E-06 |
| lsaC                                     | 6.42 | Cirrhosis | 1.51E-04 |
| catB3                                    | 6.39 | Cirrhosis | 0.00182  |
| tetS                                     | 6.39 | Cirrhosis | 0.003276 |
| AxyY                                     | 6.37 | Cirrhosis | 1.00E-06 |
| adeK                                     | 6.36 | Cirrhosis | 0.002129 |
| TEM_1                                    | 6.3  | Cirrhosis | 0.002913 |
| TEM_76                                   | 6.21 | Cirrhosis | 0.004798 |
| SRT_2                                    | 6.17 | Cirrhosis | 0.004426 |
| RlmA_II                                  | 6.12 | Cirrhosis | 6.96E-06 |
| MexF                                     | 5.98 | Cirrhosis | 0.009169 |
| tetB_46                                  | 5.91 | Cirrhosis | 1.00E-06 |
| smeF                                     | 5.86 | Cirrhosis | 0.016748 |
| QnrS1                                    | 5.83 | Cirrhosis | 0.021289 |
| efmA                                     | 5.82 | Cirrhosis | 5.21E-04 |
| TEM_219                                  | 5.81 | Cirrhosis | 0.022222 |
| ACI_1                                    | 5.79 | Cirrhosis | 1.00E-06 |
| ErmC                                     | 5.76 | Cirrhosis | 1.00E-06 |
| tlrC                                     | 5.75 | Cirrhosis | 1.00E-06 |
| mexK                                     | 5.74 | Cirrhosis | 1.00E-06 |
| lmrC                                     | 5.7  | Cirrhosis | 0.030325 |
| vanRC                                    | 5.69 | Cirrhosis | 2.96E-04 |
| patB                                     | 5.67 | Cirrhosis | 1.02E-06 |
| OprJ                                     | 5.67 | Cirrhosis | 0.030499 |
| efrB                                     | 5.53 | Cirrhosis | 0.001353 |
| TaeA                                     | 5.51 | Cirrhosis | 1.02E-06 |
| MuxC                                     | 5.43 | Cirrhosis | 1.00E-06 |

|                                                                              |      |           |          |
|------------------------------------------------------------------------------|------|-----------|----------|
| patA                                                                         | 5.43 | Cirrhosis | 1.00E-06 |
| aadS                                                                         | 5.42 | Cirrhosis | 1.00E-06 |
| smeR                                                                         | 5.27 | Cirrhosis | 1.84E-04 |
| pmrA                                                                         | 5.1  | Cirrhosis | 9.86E-05 |
| mexQ                                                                         | 5.06 | Cirrhosis | 1.00E-06 |
| MexB                                                                         | 5.03 | Cirrhosis | 1.00E-06 |
| MexD                                                                         | 5.03 | Cirrhosis | 1.10E-06 |
| Enterobacter_cloacae_acrA                                                    | 4.96 | Cirrhosis | 1.22E-06 |
| srmB                                                                         | 4.87 | Cirrhosis | 1.00E-06 |
| mexI                                                                         | 4.87 | Cirrhosis | 1.00E-06 |
| dfrA17                                                                       | 4.83 | Cirrhosis | 1.00E-06 |
| mtrD                                                                         | 4.83 | Cirrhosis | 1.28E-06 |
| KPC_12                                                                       | 4.81 | Cirrhosis | 0.029381 |
| OXY_4_1                                                                      | 4.81 | Cirrhosis | 0.029381 |
| PC1_beta_lactamase_blaZ                                                      | 4.77 | Cirrhosis | 3.30E-04 |
| smeS                                                                         | 4.68 | Cirrhosis | 0.004563 |
| lmrD                                                                         | 4.67 | Cirrhosis | 0.039248 |
| efrA                                                                         | 4.65 | Cirrhosis | 0.004939 |
| tetU                                                                         | 4.44 | Cirrhosis | 1.00E-06 |
| carA                                                                         | 4.44 | Cirrhosis | 0.002335 |
| RbpA                                                                         | 4.44 | Cirrhosis | 0.023937 |
| Nocardia_rifampin_resistant_beta_subunit_of_RNA_polymerase_rpoB2             | 4.42 | Cirrhosis | 1.00E-06 |
| otr_A                                                                        | 4.36 | Cirrhosis | 0.003221 |
| mexY                                                                         | 4.32 | Cirrhosis | 0.027566 |
| vanRD                                                                        | 4.29 | Cirrhosis | 1.05E-06 |
| smeE                                                                         | 4.26 | Cirrhosis | 1.00E-06 |
| MuxB                                                                         | 4.18 | Cirrhosis | 1.02E-06 |
| tetX                                                                         | 4.14 | Cirrhosis | 1.00E-06 |
| smeB                                                                         | 4.1  | Cirrhosis | 1.00E-06 |
| oleB                                                                         | 4.02 | Cirrhosis | 1.00E-06 |
| AAC_3_IIb                                                                    | 3.99 | Cirrhosis | 1.00E-06 |
| novA                                                                         | 3.97 | Cirrhosis | 6.17E-04 |
| AAC_6_Im                                                                     | 3.96 | Cirrhosis | 4.61E-04 |
| macB                                                                         | 3.94 | Cirrhosis | 1.00E-06 |
| CTX_M_50                                                                     | 3.92 | Cirrhosis | 1.00E-06 |
| vanSA                                                                        | 3.9  | Cirrhosis | 0.007172 |
| Streptomyces_rishiriensis_parY_mutant_conferring_resistance_to_aminocoumarin | 3.89 | Cirrhosis | 1.00E-06 |
| efpA                                                                         | 3.87 | Cirrhosis | 1.00E-06 |

|                                                                      |      |           |          |
|----------------------------------------------------------------------|------|-----------|----------|
| mcrC                                                                 | 3.83 | Cirrhosis | 1.00E-06 |
| mexW                                                                 | 3.82 | Cirrhosis | 1.77E-06 |
| vanSD                                                                | 3.82 | Cirrhosis | 1.77E-05 |
| ramA                                                                 | 3.66 | Cirrhosis | 9.52E-06 |
| mcrE                                                                 | 3.65 | Cirrhosis | 5.88E-05 |
| MuxA                                                                 | 3.57 | Cirrhosis | 1.27E-06 |
| vanXD                                                                | 3.55 | Cirrhosis | 0.038097 |
| Bifidobacteria_intrinsic_ileS_<br>conferring_resistance_to_mupirocin | 3.53 | Cirrhosis | 1.00E-06 |
| EreA2                                                                | 3.53 | Cirrhosis | 0.016658 |
| CblA_1                                                               | 3.51 | Cirrhosis | 1.00E-06 |
| mphE                                                                 | 3.44 | Cirrhosis | 1.00E-06 |
| vanHD                                                                | 3.44 | Cirrhosis | 0.041956 |
| OXA_184                                                              | 3.43 | Cirrhosis | 4.62E-04 |
| tet_C                                                                | 3.42 | Cirrhosis | 2.86E-06 |
| vanRA                                                                | 3.4  | Cirrhosis | 0.001503 |
| vanD                                                                 | 3.4  | Cirrhosis | 0.048939 |
| FosA5                                                                | 3.33 | Cirrhosis | 0.006181 |
| msbA                                                                 | 3.31 | Cirrhosis | 1.00E-06 |
| Klebsiella_pneumoniae_KpnE                                           | 3.3  | Cirrhosis | 1.00E-06 |
| CTX_M_69                                                             | 3.3  | Cirrhosis | 0.024235 |
| mel                                                                  | 3.29 | Cirrhosis | 1.00E-06 |
| qepA                                                                 | 3.26 | Cirrhosis | 6.75E-06 |
| FosA6                                                                | 3.25 | Cirrhosis | 8.44E-04 |
| vanXYG                                                               | 3.21 | Cirrhosis | 0.002331 |
| tetW                                                                 | 3.2  | Cirrhosis | 1.00E-06 |
| Klebsiella_pneumoniae_KpnH                                           | 3.18 | Cirrhosis | 1.00E-06 |
| oqxA                                                                 | 3.18 | Cirrhosis | 2.94E-06 |
| CRP                                                                  | 3.13 | Cirrhosis | 1.00E-06 |
| vanI                                                                 | 3.12 | Cirrhosis | 1.64E-05 |
| baeR                                                                 | 3.1  | Cirrhosis | 1.00E-06 |
| ugd                                                                  | 3.09 | Cirrhosis | 1.00E-06 |
| Klebsiella_pneumoniae_KpnG                                           | 3.06 | Cirrhosis | 1.16E-06 |
| mdtB                                                                 | 3.05 | Cirrhosis | 1.00E-06 |
| SHV_11                                                               | 3.04 | Cirrhosis | 0.011778 |
| CfxA6                                                                | 3.03 | Cirrhosis | 3.30E-06 |
| acrB                                                                 | 3.01 | Cirrhosis | 1.00E-06 |
| Escherichia_coli_ampC                                                | 3    | Cirrhosis | 1.00E-06 |
| CTX_M_117                                                            | 2.97 | Cirrhosis | 9.14E-05 |
| Klebsiella_pneumoniae_acrA                                           | 2.96 | Cirrhosis | 4.13E-05 |

|                              |      |           |          |
|------------------------------|------|-----------|----------|
| dfrA14                       | 2.96 | Cirrhosis | 0.033072 |
| SAT_1                        | 2.95 | Cirrhosis | 2.74E-04 |
| mdtO                         | 2.86 | Cirrhosis | 1.00E-06 |
| APH_3_IIIa                   | 2.86 | Cirrhosis | 1.00E-06 |
| mdtA                         | 2.86 | Cirrhosis | 1.01E-06 |
| mdtK                         | 2.81 | Cirrhosis | 1.08E-06 |
| sdiA                         | 2.79 | Cirrhosis | 0.005375 |
| emrB                         | 2.77 | Cirrhosis | 1.44E-06 |
| Escherichia_coli_ampH        | 2.76 | Cirrhosis | 1.21E-06 |
| tolC                         | 2.75 | Cirrhosis | 1.20E-06 |
| H_NS                         | 2.73 | Cirrhosis | 1.24E-06 |
| Klebsiella_pneumoniae_OmpK37 | 2.73 | Cirrhosis | 2.33E-06 |
| Escherichia_coli_mdfA        | 2.71 | Cirrhosis | 1.27E-06 |
| mdtP                         | 2.7  | Cirrhosis | 2.65E-06 |
| cpxA                         | 2.69 | Cirrhosis | 1.38E-06 |
| emrR                         | 2.67 | Cirrhosis | 1.05E-06 |
| mdtG                         | 2.67 | Cirrhosis | 2.64E-06 |
| aadA16                       | 2.61 | Cirrhosis | 0.00221  |
| mdtE                         | 2.58 | Cirrhosis | 2.80E-05 |
| CfxA                         | 2.57 | Cirrhosis | 2.35E-06 |
| TEM_157                      | 2.57 | Cirrhosis | 3.45E-04 |
| AAC_6_Ib10                   | 2.55 | Cirrhosis | 0.02211  |
| Escherichia_coli_acrA        | 2.54 | Cirrhosis | 8.86E-06 |
| Erm_35                       | 2.54 | Cirrhosis | 0.013394 |
| tet_W_N_W                    | 2.51 | Cirrhosis | 1.00E-06 |
| CfxA2                        | 2.51 | Cirrhosis | 6.53E-06 |
| CfxA4                        | 2.51 | Cirrhosis | 6.70E-06 |
| pmrF                         | 2.51 | Cirrhosis | 9.06E-06 |
| Klebsiella_pneumoniae_KpnF   | 2.5  | Cirrhosis | 6.93E-05 |
| mdtF                         | 2.49 | Cirrhosis | 4.88E-05 |
| tetM                         | 2.43 | Cirrhosis | 4.37E-06 |
| acrE                         | 2.39 | Cirrhosis | 8.45E-05 |
| marA                         | 2.39 | Cirrhosis | 1.67E-04 |
| tetQ                         | 2.37 | Cirrhosis | 2.21E-06 |
| APH_3_Ia                     | 2.36 | Cirrhosis | 0.016164 |
| tetO                         | 2.34 | Cirrhosis | 2.67E-06 |
| InuC                         | 2.33 | Cirrhosis | 4.23E-04 |
| mdtH                         | 2.31 | Cirrhosis | 9.90E-05 |
| emrA                         | 2.31 | Cirrhosis | 2.84E-04 |

|                     |       |           |          |
|---------------------|-------|-----------|----------|
| eptA                | 2.28  | Cirrhosis | 3.33E-04 |
| kdpE                | 2.21  | Cirrhosis | 1.63E-06 |
| CfxA3               | 2.21  | Cirrhosis | 2.90E-04 |
| mdtC                | 2.18  | Cirrhosis | 1.80E-04 |
| acrF                | 2.12  | Cirrhosis | 0.00141  |
| mdtM                | 2.09  | Cirrhosis | 0.003141 |
| ANT_3_Ila           | 2.09  | Cirrhosis | 0.016791 |
| TEM_40              | 2.05  | Cirrhosis | 0.037867 |
| mdtN                | 2.04  | Cirrhosis | 0.004039 |
| ErmG                | 2.02  | Cirrhosis | 0.011967 |
| TEM_116             | 1.98  | Cirrhosis | 0.025737 |
| tet_D               | 1.98  | Cirrhosis | 0.026618 |
| gadX                | 1.81  | Cirrhosis | 0.010844 |
| evgS                | 1.7   | Cirrhosis | 0.035113 |
| lsaE                | -1    | CKD       | 0.028029 |
| AAC_3_Ilc           | -1.09 | CKD       | 0.032367 |
| OXA_347             | -1.2  | CKD       | 1.01E-06 |
| yojI                | -1.35 | CKD       | 1.00E-06 |
| TEM_102             | -1.64 | CKD       | 1.00E-06 |
| CTX_M_141           | -2.09 | CKD       | 0.005648 |
| sul1                | -2.5  | CKD       | 1.00E-06 |
| SHV_99              | -2.91 | CKD       | 0.009639 |
| CMY_9               | -3.14 | CKD       | 2.58E-04 |
| LnuP                | -3.17 | CKD       | 3.44E-05 |
| ErmQ                | -3.94 | CKD       | 9.49E-05 |
| SHV_46              | -4.29 | CKD       | 6.32E-04 |
| OKP_B_5             | -4.39 | CKD       | 4.45E-04 |
| MCR_1_4             | -4.9  | CKD       | 1.05E-06 |
| ACT_32              | -5.19 | CKD       | 1.00E-06 |
| npmA                | -5.63 | CKD       | 1.98E-05 |
| APH_2_If            | -6.81 | CKD       | 1.00E-06 |
| Sed1_beta_lactamase | -6.88 | CKD       | 1.00E-06 |
| ACT_38              | -7.73 | CKD       | 1.00E-06 |
| CTX_M_21            | -7.92 | CKD       | 1.00E-06 |
| CTX_M_42            | -10.3 | CKD       | 1.00E-06 |
| SHV_67              | -13.8 | CKD       | 1.00E-06 |

Table S20: Differences between CKD and Cirrhosis AMR Gene Families

| Lineage                                                           | LOG2FC | Direction | pvalue   |
|-------------------------------------------------------------------|--------|-----------|----------|
| resistance_nodulation_cell_division_RND_antibiotic_efflux_pump    | 16.42  | Cirrhosis | 1.00E-06 |
| Erm_23S_ribosomal_RNA_methyltransferase                           | 13.36  | Cirrhosis | 1.00E-06 |
| CfxA_beta_lactamase                                               | 13.25  | Cirrhosis | 1.00E-06 |
| pmr_phosphoethanolamine_transferase                               | 13.08  | Cirrhosis | 1.00E-06 |
| APH_3                                                             | 11.47  | Cirrhosis | 1.00E-06 |
| glycopeptide_resistance_gene_cluster                              | 11.46  | Cirrhosis | 1.00E-06 |
| kdpDE                                                             | 11.26  | Cirrhosis | 1.00E-06 |
| cepA_beta_lactamase                                               | 11.13  | Cirrhosis | 1.00E-06 |
| CTX_M_beta_lactamase                                              | 11.08  | Cirrhosis | 1.00E-06 |
| macrolide_phosphotransferase_MPH                                  | 10.77  | Cirrhosis | 1.00E-06 |
| fosfomycin_thiol_transferase                                      | 9.35   | Cirrhosis | 1.00E-06 |
| NmcA_beta_lactamase                                               | 7.9    | Cirrhosis | 1.00E-06 |
| PDC_beta_lactamase                                                | 6.89   | Cirrhosis | 1.02E-06 |
| CMY_beta_lactamase                                                | 6.78   | Cirrhosis | 6.52E-04 |
| ACI_beta_lactamase                                                | 6.23   | Cirrhosis | 1.00E-06 |
| non_erm_23S_ribosomal_RNA_methyltransferase_G748                  | 5.21   | Cirrhosis | 1.05E-04 |
| ACT_beta_lactamase                                                | 5.2    | Cirrhosis | 4.87E-04 |
| vanX                                                              | 4.89   | Cirrhosis | 0.007295 |
| multidrug_and_toxic_compound_extrusion_MATE_transporter           | 4.86   | Cirrhosis | 1.00E-06 |
| Llm_23S_ribosomal_RNA_methyltransferase                           | 4.68   | Cirrhosis | 5.81E-05 |
| blaZ_beta_lactamase                                               | 4.61   | Cirrhosis | 0.002519 |
| tetracycline_inactivation_enzyme                                  | 4.3    | Cirrhosis | 1.00E-06 |
| vanS                                                              | 4.14   | Cirrhosis | 1.02E-06 |
| KPC_beta_lactamase                                                | 4.11   | Cirrhosis | 0.041692 |
| rifamycin_resistant_beta_subunit_of_RNA_polymerase_rpoB           | 4.03   | Cirrhosis | 1.00E-06 |
| SHV_beta_lactamase                                                | 3.86   | Cirrhosis | 1.00E-06 |
| antibiotic_resistant_ileucyl_tRNA_synthetase_ileS                 | 3.84   | Cirrhosis | 1.00E-06 |
| aminocoumarin_resistant_parY                                      | 3.68   | Cirrhosis | 1.00E-06 |
| ABC_F_ATP_binding_cassette_ribosomal_protection_protein           | 3.56   | Cirrhosis | 1.00E-06 |
| AAC_3                                                             | 3.43   | Cirrhosis | 1.00E-06 |
| AAC_6                                                             | 3.3    | Cirrhosis | 4.53E-06 |
| OXA_beta_lactamase                                                | 3.09   | Cirrhosis | 9.88E-04 |
| ampC_type_beta_lactamase                                          | 2.82   | Cirrhosis | 1.00E-06 |
| undecaprenyl_pyrophosphate_related_proteins                       | 2.75   | Cirrhosis | 1.04E-06 |
| streptothricin_acetyltransferase_SAT                              | 2.72   | Cirrhosis | 1.99E-06 |
| General_Bacterial_Porin_with_reduced_permeability_to_beta_lactams | 2.68   | Cirrhosis | 9.08E-06 |
| major_facilitator_superfamily_MFS_antibiotic_efflux_pump          | 2.65   | Cirrhosis | 1.00E-06 |

|                                                       |        |           |          |
|-------------------------------------------------------|--------|-----------|----------|
| tetracycline_resistant_ribosomal_protection_protein   | 2.53   | Cirrhosis | 1.00E-06 |
| quinolone_resistance_protein_qnr                      | 2.53   | Cirrhosis | 3.14E-04 |
| trimethoprim_resistant_dihydrofolate_reductase_dfr    | 2.49   | Cirrhosis | 1.03E-06 |
| lincosamide_nucleotidyltransferase_LNU                | 2.11   | Cirrhosis | 0.002805 |
| TEM_beta_lactamase                                    | 2.09   | Cirrhosis | 0.001479 |
| small_multidrug_resistance_SMR_antibiotic_efflux_pump | 1.92   | Cirrhosis | 0.012084 |
| CblA_beta_lactamase                                   | -1.09  | CKD       | 1.00E-06 |
| RbpA_bacterial_RNA_polymerase_binding_protein         | -2.38  | CKD       | 1.00E-06 |
| OXY_beta_lactamase                                    | -2.4   | CKD       | 1.00E-06 |
| SRT_beta_lactamase                                    | -2.76  | CKD       | 1.00E-06 |
| sulfonamide_resistant_sul                             | -2.97  | CKD       | 1.00E-06 |
| APH_2                                                 | -3.93  | CKD       | 1.00E-06 |
| ANT_3                                                 | -3.97  | CKD       | 1.00E-06 |
| BUT_beta_lactamase                                    | -4.39  | CKD       | 5.44E-05 |
| Bleomycin_resistant_protein                           | -6.17  | CKD       | 1.00E-06 |
| MIR_beta_lactamase                                    | -6.53  | CKD       | 1.00E-06 |
| 16S_rRNA_methyltransferase_A1408                      | -6.85  | CKD       | 1.04E-06 |
| defensin_resistant_mprF                               | -8.5   | CKD       | 1.00E-06 |
| CKO_beta_lactamase                                    | -10.55 | CKD       | 1.00E-06 |

Table S21: Differences between CKD and Cirrhosis Resistomes

| Lineage                             | LOG2FC | Direction | pvalue   |
|-------------------------------------|--------|-----------|----------|
| <i>Escherichia_coli</i>             | 16.79  | Cirrhosis | 1.00E-06 |
| <i>Bifidobacterium_bifidum</i>      | 14.14  | Cirrhosis | 1.00E-06 |
| <i>Enterobacter_hormaechei</i>      | 13.14  | Cirrhosis | 1.00E-06 |
| <i>Streptococcus_pyogenes</i>       | 12.95  | Cirrhosis | 1.00E-06 |
| <i>Staphylococcus_aureus</i>        | 12.41  | Cirrhosis | 1.00E-06 |
| <i>Citrobacter_freundii</i>         | 12.29  | Cirrhosis | 1.00E-06 |
| <i>Streptococcus_agalactiae</i>     | 11.96  | Cirrhosis | 1.00E-06 |
| <i>Campylobacter_jejuni</i>         | 11.42  | Cirrhosis | 1.00E-06 |
| <i>Shigella_sonnei</i>              | 11.14  | Cirrhosis | 1.00E-06 |
| <i>Salmonella_enterica</i>          | 10.29  | Cirrhosis | 1.00E-06 |
| <i>Streptococcus_suis</i>           | 10.29  | Cirrhosis | 1.00E-06 |
| <i>Acinetobacter_nosocomialis</i>   | 10.24  | Cirrhosis | 1.00E-06 |
| <i>Aeromonas_media</i>              | 10.24  | Cirrhosis | 1.00E-06 |
| <i>Stenotrophomonas_maltophilia</i> | 10.15  | Cirrhosis | 1.00E-06 |
| <i>Butyrivibrio_fibrisolvens</i>    | 9.24   | Cirrhosis | 1.00E-06 |
| <i>Plasmid_pNG2</i>                 | 8.2    | Cirrhosis | 8.68E-04 |
| <i>Shigella_flexneri</i>            | 8.1    | Cirrhosis | 1.00E-06 |
| <i>Streptomyces_lividans</i>        | 8.1    | Cirrhosis | 1.00E-06 |
| <i>Clostridium_perfringens</i>      | 8.02   | Cirrhosis | 2.12E-06 |
| <i>Parabacteroides_distasonis</i>   | 7.83   | Cirrhosis | 1.00E-06 |
| <i>Citrobacter_koseri</i>           | 7.83   | Cirrhosis | 1.04E-06 |
| <i>Desulfovibrio_desulfuricans</i>  | 7.83   | Cirrhosis | 1.04E-06 |
| <i>Achromobacter_insuaavis</i>      | 7.72   | Cirrhosis | 1.00E-06 |
| <i>Acidaminococcus_fermentans</i>   | 7.06   | Cirrhosis | 1.00E-06 |
| <i>Klebsiella_oxytoca</i>           | 6.69   | Cirrhosis | 1.00E-06 |
| <i>Streptococcus_australis</i>      | 6.66   | Cirrhosis | 1.00E-06 |
| <i>Streptomyces_fradiae</i>         | 6.19   | Cirrhosis | 1.00E-06 |
| <i>Bacillus_subtilis</i>            | 5.95   | Cirrhosis | 0.028627 |
| <i>Streptomyces_lincolnensis</i>    | 5.86   | Cirrhosis | 0.035853 |
| <i>Haemophilus_influenzae</i>       | 5.61   | Cirrhosis | 1.36E-06 |
| <i>Transposon_Tn4551</i>            | 5.6    | Cirrhosis | 1.00E-06 |
| <i>Clostridioides_difficile</i>     | 5.51   | Cirrhosis | 1.00E-06 |
| <i>Prevotella_intermedia</i>        | 5.47   | Cirrhosis | 1.00E-06 |
| <i>Citrobacter_youngae</i>          | 5.45   | Cirrhosis | 5.16E-04 |
| <i>Streptomyces_antibioticus</i>    | 5.19   | Cirrhosis | 1.00E-06 |
| <i>Streptomyces_rimosus</i>         | 5.17   | Cirrhosis | 0.010737 |
| <i>Streptococcus_pneumoniae</i>     | 5.12   | Cirrhosis | 1.00E-06 |
| <i>Enterococcus_gallinarum</i>      | 4.92   | Cirrhosis | 0.007394 |
| <i>Burkholderia_cepacia</i>         | 4.75   | Cirrhosis | 1.90E-04 |

|                                     |        |           |          |
|-------------------------------------|--------|-----------|----------|
| <i>Streptomyces_ambofaciens</i>     | 4.66   | Cirrhosis | 1.00E-06 |
| <i>Streptomyces_niveus</i>          | 4.6    | Cirrhosis | 4.02E-04 |
| <i>Desulfitobacterium_hafniense</i> | 4.59   | Cirrhosis | 3.73E-06 |
| <i>Nocardia_farcinica</i>           | 4.43   | Cirrhosis | 1.00E-06 |
| <i>Streptomyces_thermotolerans</i>  | 4.38   | Cirrhosis | 0.002098 |
| <i>Enterobacter_cloacae</i>         | 4.33   | Cirrhosis | 1.00E-06 |
| <i>Vibrio_paraahaemolyticus</i>     | 4.22   | Cirrhosis | 1.00E-06 |
| <i>Serratia_marcescens</i>          | 4.07   | Cirrhosis | 0.00139  |
| <i>Paenibacillus_sp</i>             | 3.91   | Cirrhosis | 1.00E-06 |
| <i>Streptomyces_rishiriensis</i>    | 3.88   | Cirrhosis | 1.00E-06 |
| <i>Bifidobacterium_adolescentis</i> | 3.75   | Cirrhosis | 1.00E-06 |
| <i>mixed_culture</i>                | 3.58   | Cirrhosis | 1.00E-06 |
| <i>Mycobacterium_tuberculosis</i>   | 3.53   | Cirrhosis | 1.06E-06 |
| <i>Campylobacter_coli</i>           | 3.24   | Cirrhosis | 1.00E-06 |
| <i>Bacteroides_vulgatus</i>         | 2.76   | Cirrhosis | 1.17E-06 |
| <i>Bacteroides_fragilis</i>         | 2.73   | Cirrhosis | 1.00E-06 |
| <i>Citrobacter_amalonaticus</i>     | 2.56   | Cirrhosis | 1.29E-04 |
| <i>uncultured_bacterium</i>         | 2.55   | Cirrhosis | 1.00E-06 |
| <i>Enterococcus_faecalis</i>        | 2.43   | Cirrhosis | 0.0021   |
| <i>uncultured_organism</i>          | 2.2    | Cirrhosis | 1.61E-06 |
| <i>Shigella_dysenteriae</i>         | 2      | Cirrhosis | 0.034339 |
| <i>Capnocytophaga_ochracea</i>      | 1.98   | Cirrhosis | 0.004919 |
| <i>Neisseria_gonorrhoeae</i>        | 1.66   | Cirrhosis | 0.028076 |
| <i>Bacteroides_thetaiotaomicron</i> | 1.14   | Cirrhosis | 0.028355 |
| <i>Klebsiella_pneumoniae</i>        | -1.49  | CKD       | 1.00E-06 |
| <i>Acinetobacter_baumannii</i>      | -3.04  | CKD       | 1.00E-06 |
| <i>Enterobacter_asburiae</i>        | -3.18  | CKD       | 1.00E-06 |
| <i>Bacteroides_coprosuis</i>        | -3.2   | CKD       | 1.00E-06 |
| <i>Legionella_pneumophila</i>       | -3.24  | CKD       | 1.00E-06 |
| <i>Morganella_morganii</i>          | -3.53  | CKD       | 1.00E-06 |
| <i>Vibrio_cholerae</i>              | -4     | CKD       | 1.00E-06 |
| <i>Aeromonas_salmonicida</i>        | -5.7   | CKD       | 3.18E-05 |
| <i>Providencia_stuartii</i>         | -6.93  | CKD       | 1.00E-06 |
| <i>Ralstonia_pickettii</i>          | -7.21  | CKD       | 1.00E-06 |
| <i>Buttiauxella_agrestis</i>        | -9.33  | CKD       | 1.00E-06 |
| <i>Proteobacteria</i>               | -10.75 | CKD       | 1.00E-06 |
| <i>Citrobacter_sedlakii</i>         | -11.91 | CKD       | 1.00E-06 |
| <i>Citrobacter_sp</i>               | -12.75 | CKD       | 1.00E-06 |

**Table S22: Average Model Accuracy for Naïve Predictions in Cirrhosis Vs CKD & Diabetes**

| <b>AMR</b>          | <b>Classification Accuracy</b> | <b>Sensitivity</b> | <b>Specificity</b> | <b>Area Under the Curve</b> |
|---------------------|--------------------------------|--------------------|--------------------|-----------------------------|
| Classification Tree | 0.95164                        | 0.92308            | 0.986              | 0.9846                      |
| CN2 rules           | 0.96376                        | 0.99144            | 0.96262            | 0.9976                      |
| kNN                 | 0.8346                         | 0.8346             | 0.8346             | 0.8346                      |
| Logistic regression | 0.91616                        | 0.85268            | 0.96378            | 0.9869                      |
| Naive Bayes         | 0.88354                        | 0.8419             | 0.96144            | 0.98716                     |
| Neural Network      | 0.92292                        | 0.86968            | 0.96494            | 0.99076                     |
| Random Forest       | 0.98338                        | 0.97866            | 0.99184            | 0.99992                     |
| SVM                 | 0.79372                        | 0.8419             | 0.82012            | 0.96534                     |
| <b>ARG</b>          | <b>Classification Accuracy</b> | <b>Sensitivity</b> | <b>Specificity</b> | <b>Area Under the Curve</b> |
| Classification Tree | 0.97616                        | 0.97616            | 0.97616            | 0.97616                     |
| CN2 rules           | 0.9854                         | 1                  | 0.98204            | 0.99992                     |
| kNN                 | 0.92002                        | 0.82762            | 0.97846            | 0.98712                     |
| Logistic regression | 0.98464                        | 0.95904            | 0.9988             | 0.99944                     |
| Naive Bayes         | 0.91                           | 0.85996            | 0.994              | 0.91                        |
| Neural Network      | 0.98464                        | 0.96554            | 0.9964             | 0.99964                     |
| Random Forest       | 1                              | 1                  | 1                  | 1                           |
| SVM                 | 0.68694                        | 0.9806             | 0.53702            | 0.68694                     |
| <b>Resistome</b>    | <b>Classification Accuracy</b> | <b>Sensitivity</b> | <b>Specificity</b> | <b>Area Under the Curve</b> |
| Classification Tree | 0.95684                        | 0.96576            | 0.97224            | 0.98276                     |
| CN2 rules           | 0.92606                        | 0.97218            | 0.91304            | 0.9936                      |
| kNN                 | 0.84586                        | 0.72014            | 0.97464            | 0.9579                      |
| Logistic regression | 0.93298                        | 0.91024            | 0.97464            | 0.9939                      |
| Naive Bayes         | 0.9121                         | 0.88032            | 0.9831             | 0.99454                     |
| Neural Network      | 0.94454                        | 0.92522            | 0.97708            | 0.99596                     |
| Random Forest       | 0.99618                        | 0.99144            | 0.9988             | 1                           |
| SVM                 | 0.82734                        | 0.88886            | 0.83094            | 0.96416                     |
